# Supplementary material for: The Chinese herbal formula Free and Easy Wanderer ameliorates oxidative stress through KEAP1-NRF2/HO-1 pathway
Source: PubMed Central journal article supplement (PMC5599498; doi:10.1038/s41598-017-10443-6), 2017-09-14
Supplement: 41598_2017_10443_MOESM1_ESM.pdf [file 41598_2017_10443_MOESM1_ESM.pdf]

# **The Chinese herbal formula *Free and Easy Wanderer* ameliorates oxidative stress through the KEAP1-NRF2/HO-1 pathway**

**Authors:** Chunlan Hong<sup>1,6</sup>, Jingming Cao<sup>1</sup>, Ching-Fen Wu<sup>1</sup>, Onat Kadioglu<sup>1</sup>, Anja Schöffler<sup>2</sup>, Ulrich Kauh<sup>3</sup>, Sabine M. Klauck<sup>4</sup>, Till Opatz<sup>3</sup>, Eckhard Thines<sup>2</sup>, Norbert W. Paul<sup>5,6</sup>, Thomas Efferth<sup>1\*</sup>

## **Affiliations:**

1 Department of Pharmaceutical Biology, Institute of Pharmacy and Biochemistry, Johannes Gutenberg University, Staudinger Weg 5, 55128 Mainz, Germany

2 Institute of Biotechnology and Drug Research, Kaiserslautern, Germany, and Institute of Biotechnology, Johannes Gutenberg University, Mainz, Germany.

3 Institute of Organic Chemistry, Johannes Gutenberg University, Mainz, Germany.

4 Division of Cancer Genome Research, German Cancer Research Center (DKFZ), German Cancer Consortium (DKTK), and National Center for Tumor Diseases (NCT), Heidelberg, Germany.

5 Institute of History, Theory and Ethics of Medicine, Johannes Gutenberg University Medical Center, Mainz, Germany

6 DFG Research Training Group GRK 2015/1, Johannes Gutenberg University Medical Center, Mainz, Germany

## **\* Corresponding author:**

Tel: 49-6131-3925751;

Fax: 49-6131-3923752;

Email: [efferth@uni-mainz.de](mailto:efferth@uni-mainz.de)

**Running Title:** Chinese FAEW formula ameliorates oxidative stress

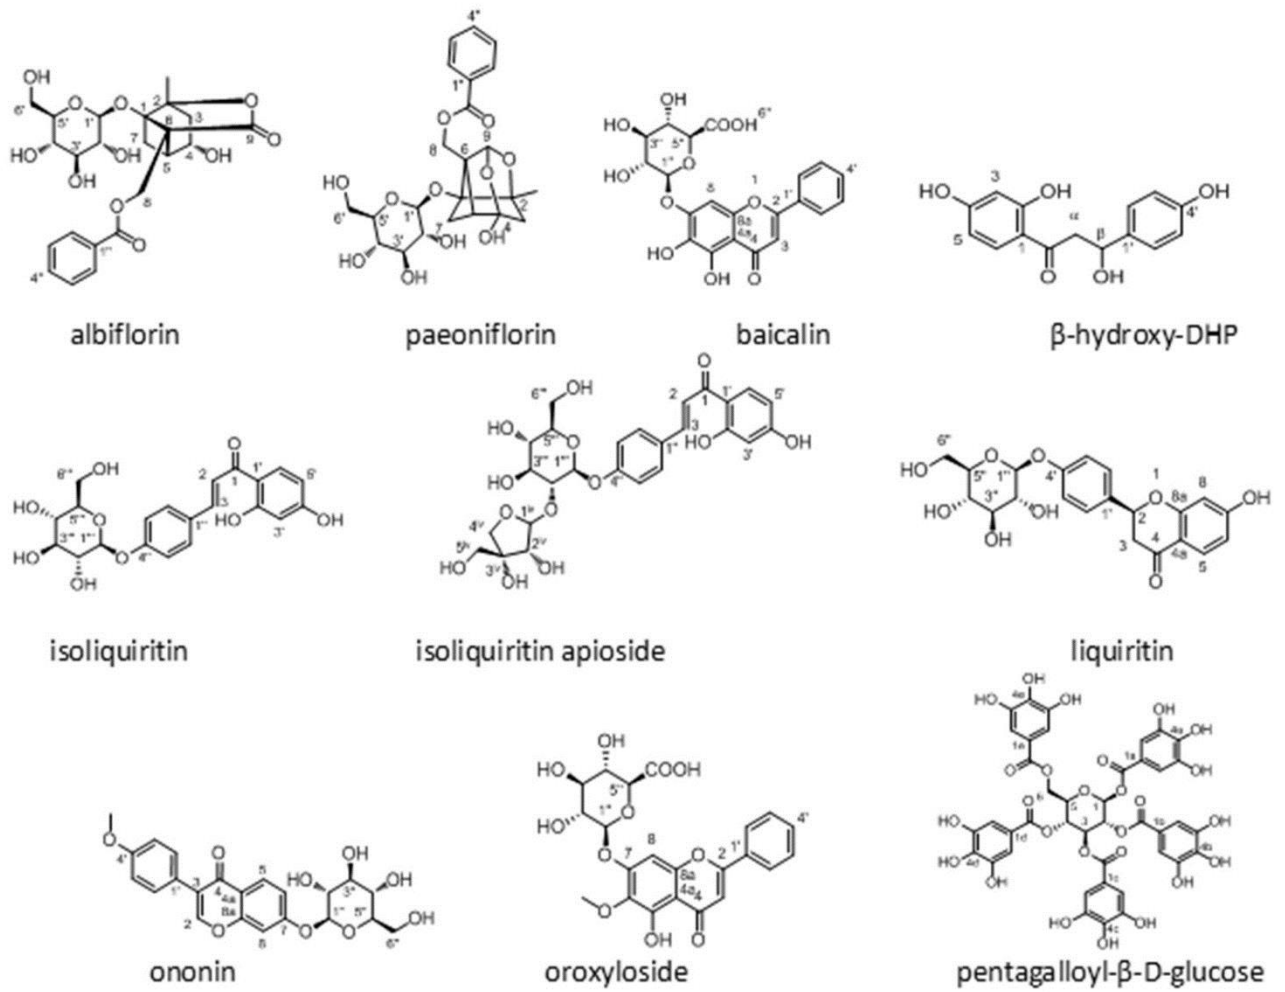

**Supplementary Fig. S1.** The structures of 10 compounds isolated from FAEW.

**Supplementary Table S1.** *In silico* molecular docking of chemical compounds isolated from FAEW to Kelch-like ECH-associated protein 1 (KEAP1).

| <b>Ligands</b>                   | <b>Binding energy (kcal/mol)</b> | <b>Ki (<math>\mu</math>M)</b> | <b>Residues forming H-bonds</b>        | <b>Residues involved in hydrophobic interactions</b>                                                           |
|----------------------------------|----------------------------------|-------------------------------|----------------------------------------|----------------------------------------------------------------------------------------------------------------|
| Baicalin                         | -7.45 $\pm$ 0.04                 | 3.47 $\pm$ 0.23               | Asn382, Asn414, Arg415, Ser555, Ser602 | Tyr334, Arg380, Ile461, Gly462, Phe478, Ser508, Ala556, Tyr572                                                 |
| Ononin                           | -5.57 $\pm$ 0.08                 | 83.58 $\pm$ 10.40             | Ser602                                 | Tyr334, Ser363, Gly364, Arg415, Ile416, Gly462, Ala556, Tyr572, Phe577, Gly603                                 |
| Isoliquiritin                    | -5.87 $\pm$ 0.19                 | 51.78 $\pm$ 15.65             | Asn382, Ser602                         | Tyr334, Gly364, Arg415, Ile416, Gly462, Gly509, Ala510, Ala556, Phe577, Gly603                                 |
| Liquiritin                       | -6.86 $\pm$ 0.06                 | 9.46 $\pm$ 0.93               | Arg380, Arg415, Ser555                 | Tyr334, Ser363, Gly364, Asn382, Asn414, Gly462, Arg483, Gly509, Tyr525, Gln530, Ala556, Ser602                 |
| Isoliquiritin apioside           | -4.42 $\pm$ 0.19                 | 592.15 $\pm$ 191.29           | Tyr334, Asn414, Arg415                 | Ser363, Asn382, Ile461, Gly462, Arg483, Ser508, Gly509, Tyr525, Tyr572, Phe577, Ser602                         |
| $\beta$ -hydroxy-DHP             | -5.32 $\pm$ 0.34                 | 139.60 $\pm$ 25.36            | Asn382                                 | Tyr334, Ser363, Gly364, Arg380, Asn414, Arg415, Ile416, Gly462, Ala556, Gly603                                 |
| Pentagalloyl- $\beta$ -D-glucose | -2.68 $\pm$ 0.14                 | 11.15 $\pm$ 2.51              | Asn382, Arg483                         | Tyr334, Ser363, Arg415, Gly509, Tyr525, Gln528, Asp529, Gln530, Ser555, Ala556, Tyr572, Phe577, Ser602         |
| Oroxyloside                      | -7.89 $\pm$ 0.27                 | 1.73 $\pm$ 0.45               | Ser363, Arg380, Asn382, Arg415, Ser602 | Tyr334, Gly364, Leu365, Asn414, Ile416, Gly462, Gly509, Ala556, Gly603                                         |
| Albiflorin                       | -5.93 $\pm$ 0.14                 | 45.95 $\pm$ 11.73             | Asn382                                 | Tyr334, Ser363, Gly364, Arg380, Asn414, Arg415, Arg483, Tyr525, Gln530, Ser555, Ala556, Tyr572, Phe577, Ser602 |
| Paeoniflorin                     | -6.00 $\pm$ 0.08                 | 68.01 $\pm$ 5.23              | Arg415                                 | Tyr334, Ser363, Asn414, Gly462, Ser508, Gly509, Tyr525, Ala556, Ser602                                         |
| Fluoxetine (R)                   | -4.99 $\pm$ 0.07                 | 221.02 $\pm$ 24.87            | Asn382, Asn414, Arg415, Ser555, Ser602 | Gly364, Arg415, Gly462, Val463, Ser508, Gly509, Ala510, Tyr525, Ala556, Gly603, Val604                         |
| Fluoxetine (S)                   | -5.01 $\pm$ 0.20                 | 220.93 $\pm$ 80.57            | Ser602                                 | Gly364, Arg415, Ile461, Gly462, Phe478, Arg483, Ser508, Gly509, Ser555, Ala556,                                |
| IQK                              | -9.52 $\pm$ 0.18                 | 0.11 $\pm$ 0.03               | Arg415, Gln530, Ser555                 | Ser363, Gly364, Asn414, Ile461, Arg483, Ser508, Gly509, Tyr525, Gln530, Ser555, Ala556, Phe577, Ser602, Gly603 |

## Supplementary data

### 1 Isolation

Standardized HPLC/MS method:

Column: Agilent XDB Phenyl, 3.5  $\mu$ m, 150 x 3 mm  
Temperature: 40 °C (column oven)  
Solvents: H<sub>2</sub>O with 0.1% HCOOH and MeCN  
Gradient: 1% MeCN to 50 % MeCN in 40 min  
50% MeCN to 100 % MeCN in 5min  
100% MeCN isocratic for 2 min  
100% MeCN to 1 % MeCN in 1 min  
Flow: 0.45 ml/min  
MS: Ion source: APCI  
Capillary voltage: 3500 V (pos.)/2200 V (neg.)  
Corona current: 4.0  $\mu$ A (pos.)/12  $\mu$ A (neg.)  
Drying Gas Flow: 6.0 l/min  
Nebulizer pressure: 50 psig  
Drying Gas Temperature: 350 °C  
Vaporizer Temperature: 400 °C

Crude extract “free and easy wanderer“ (HPLC-MS chromatogram, 250 nm)

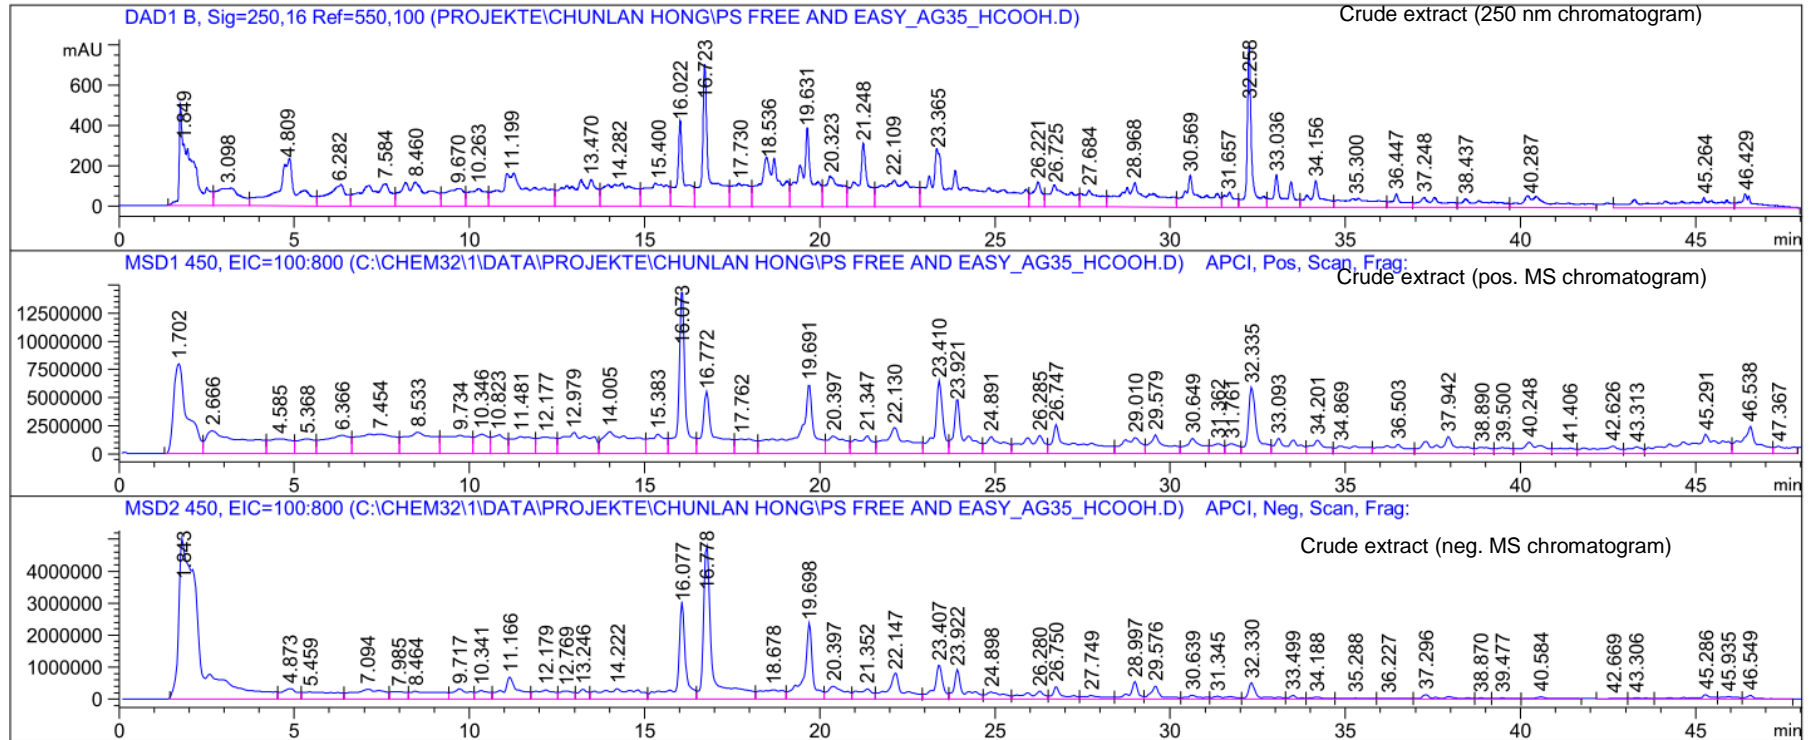

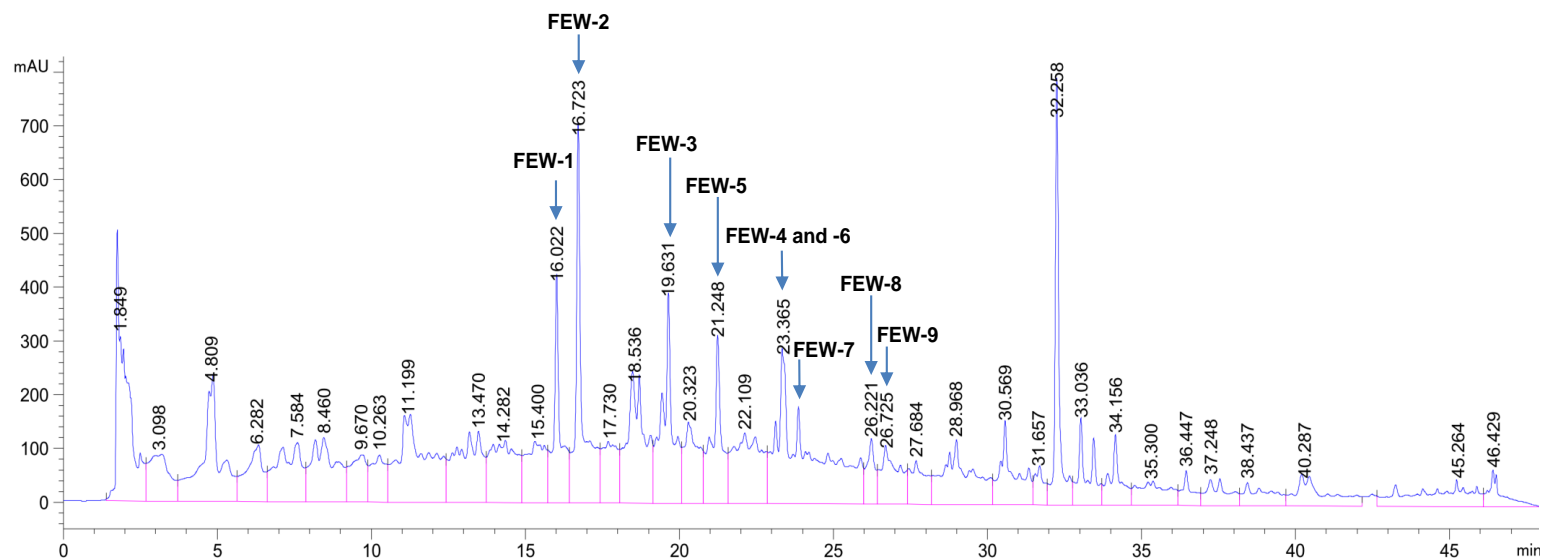

HPLC chromatogram (250 nm) of the crude extract (free and easy wanderer), isolated compounds are marked

# 1.1. FAEW-1 Albiflorin

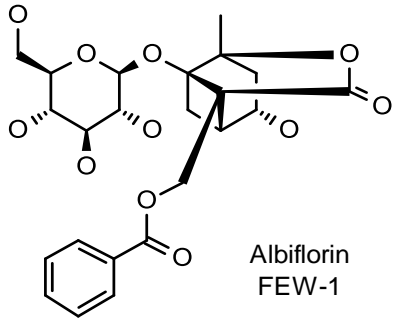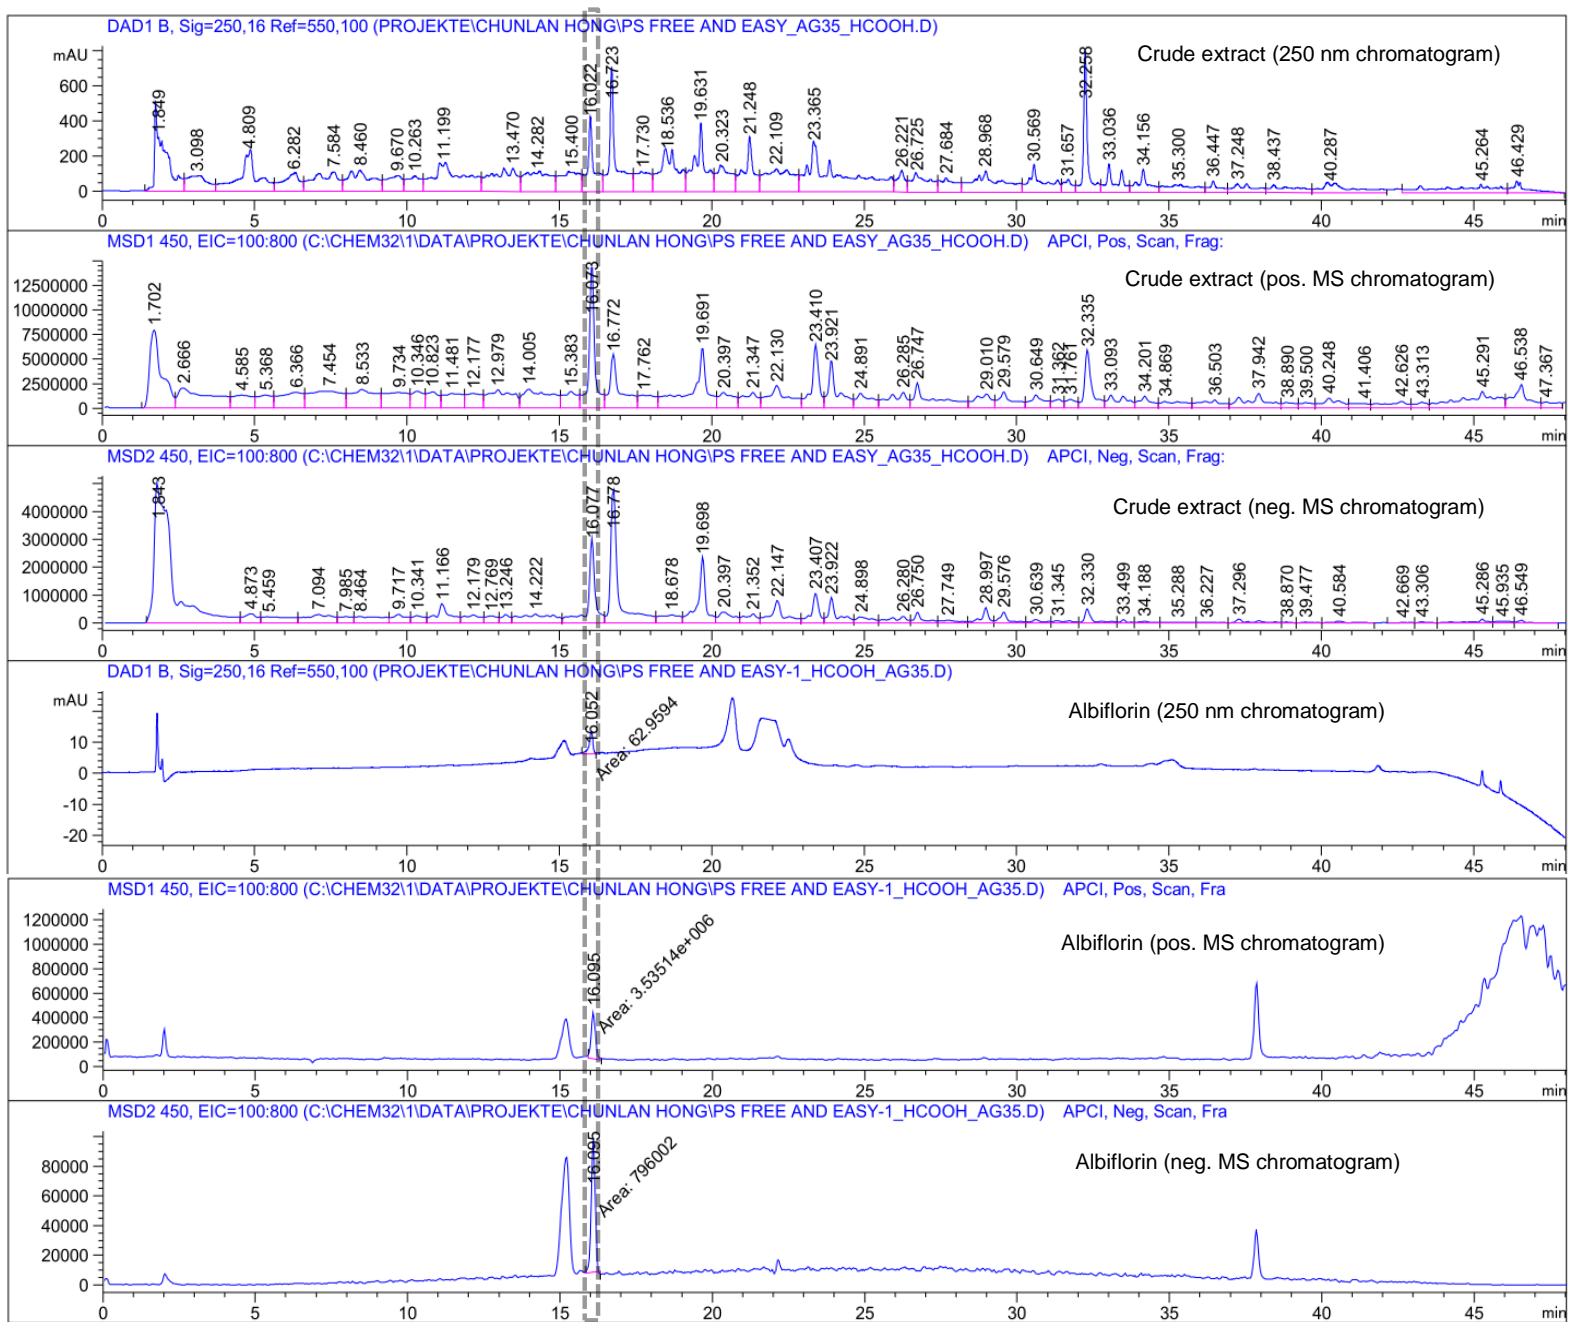

# Albiflorin MS-spectra (comparison of corresponding MS spectra)

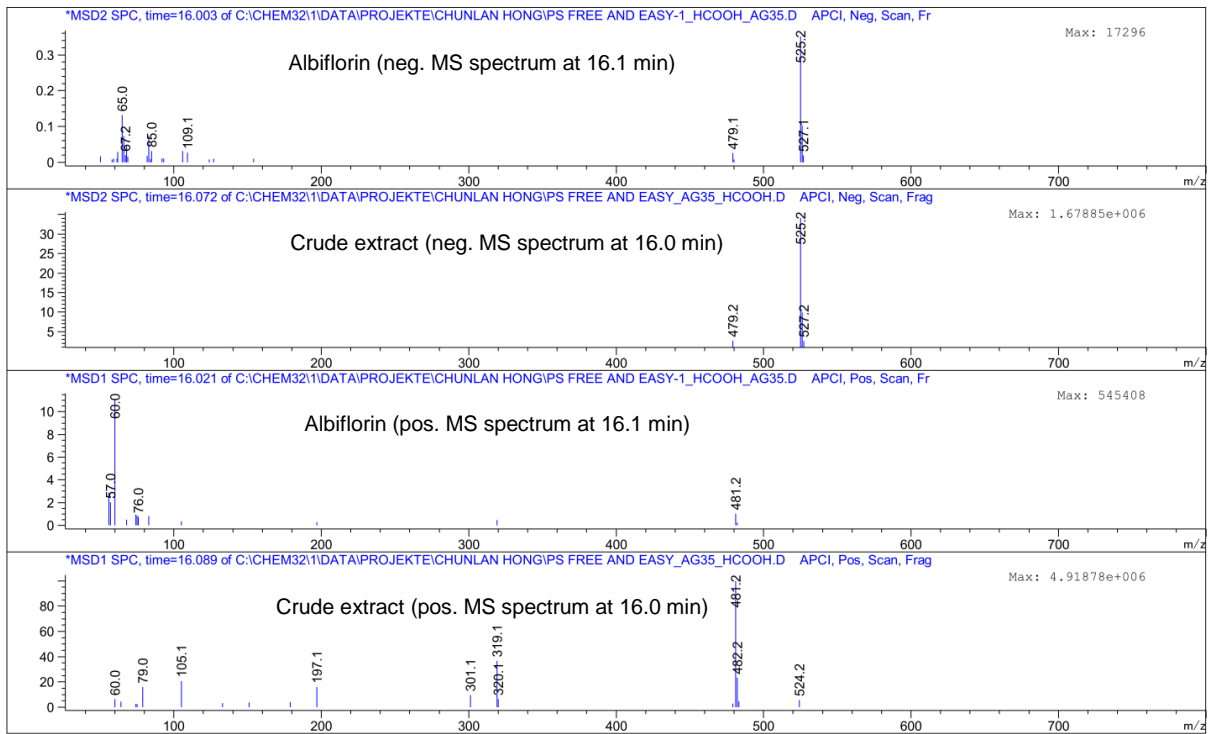



## 1.2. FAEW-2 Paeniflorin

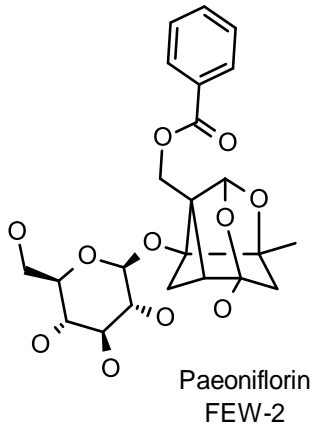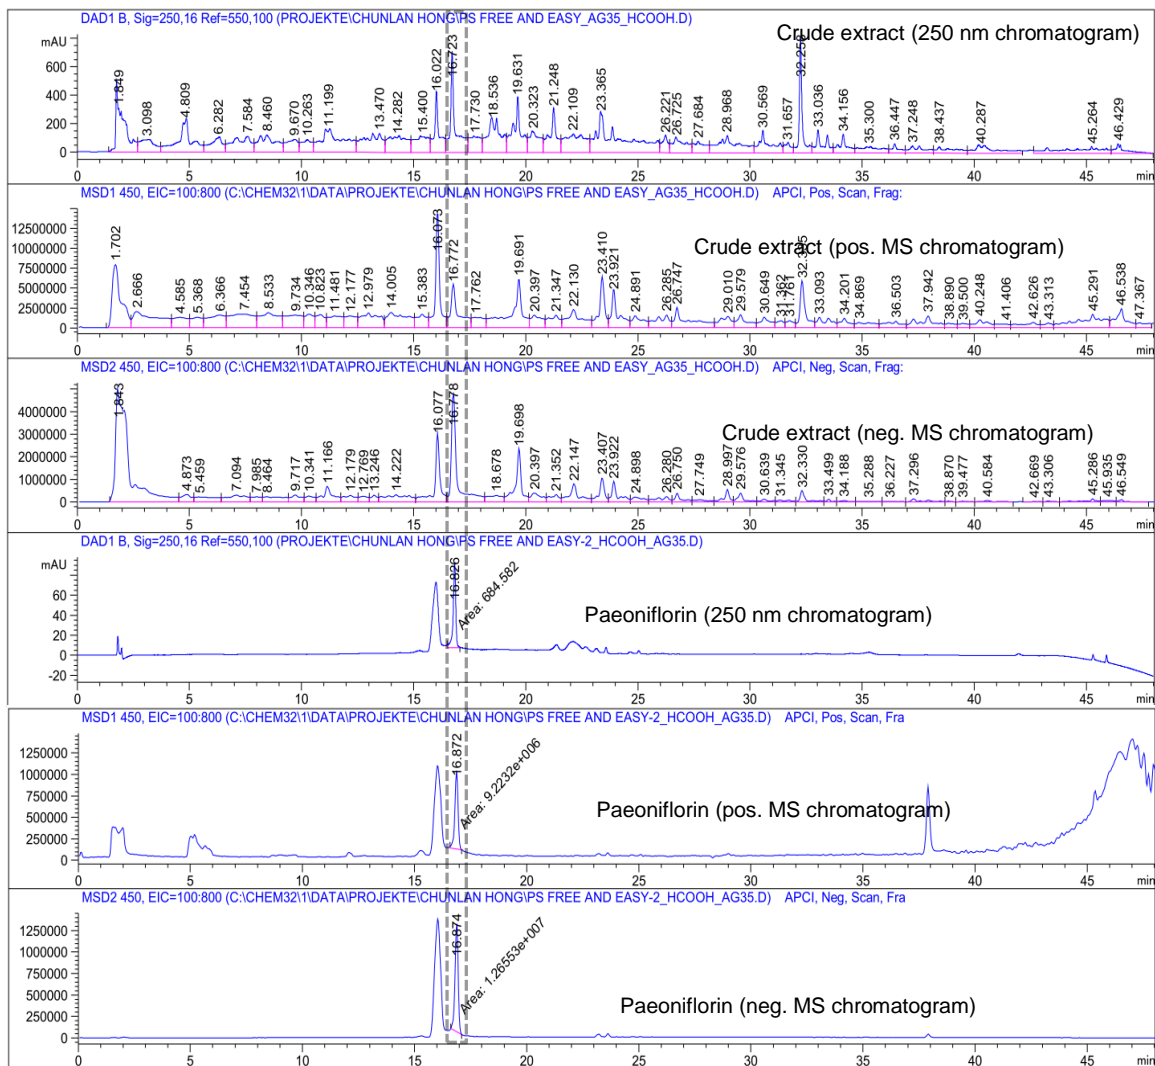

### Paeoniflorin: negative MS-spectrum (comparison of corresponding MS spectrum)

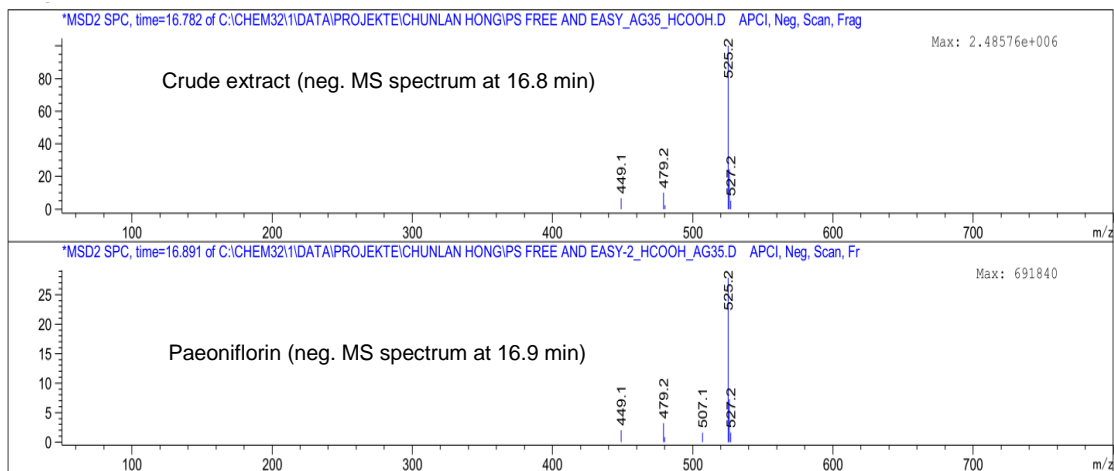

### 1.3. FAEW-3 Liquiritin

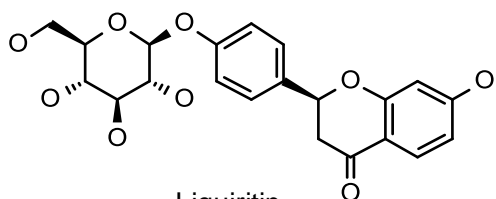

Liquiritin  
FEW-3

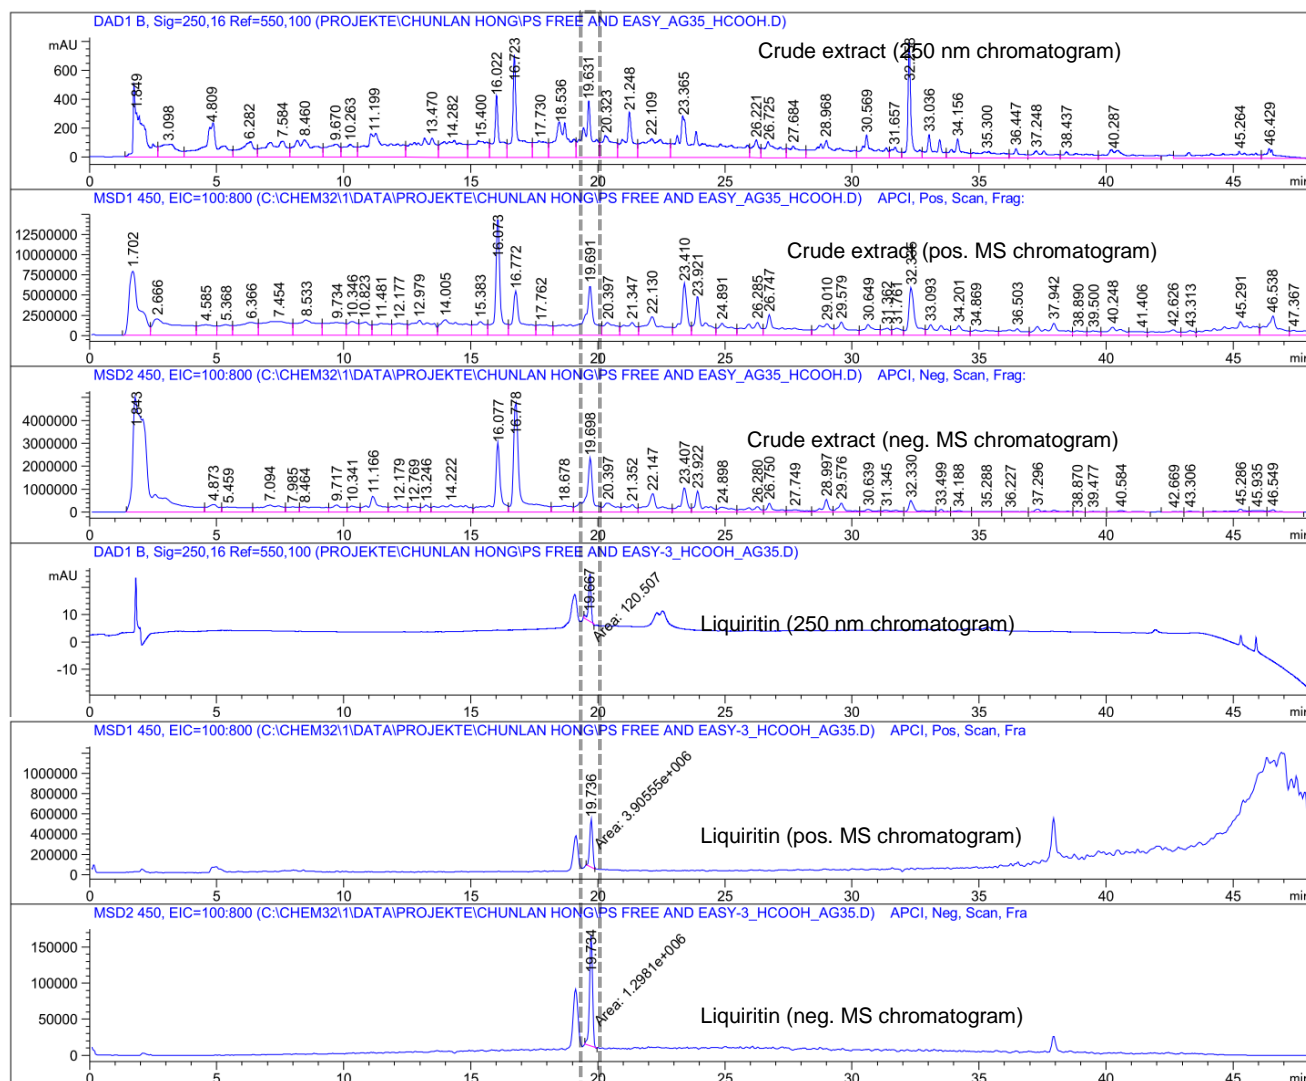

Liquiritin: MS-spectra (comparison of corresponding MS spectra)

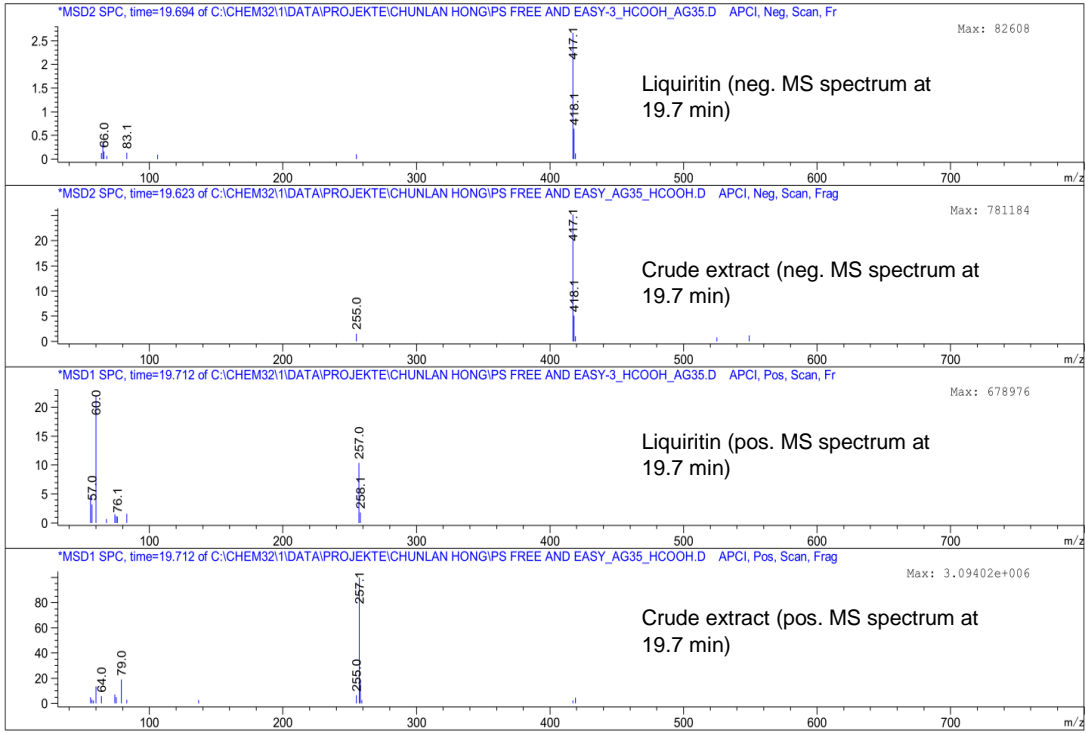

### 1.4. FAEW-4 Baicalin

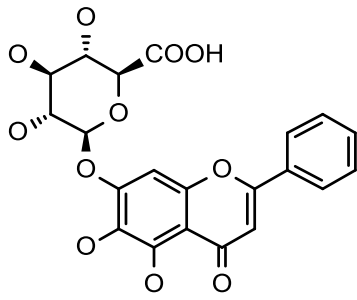

Baicalin  
FEW-4

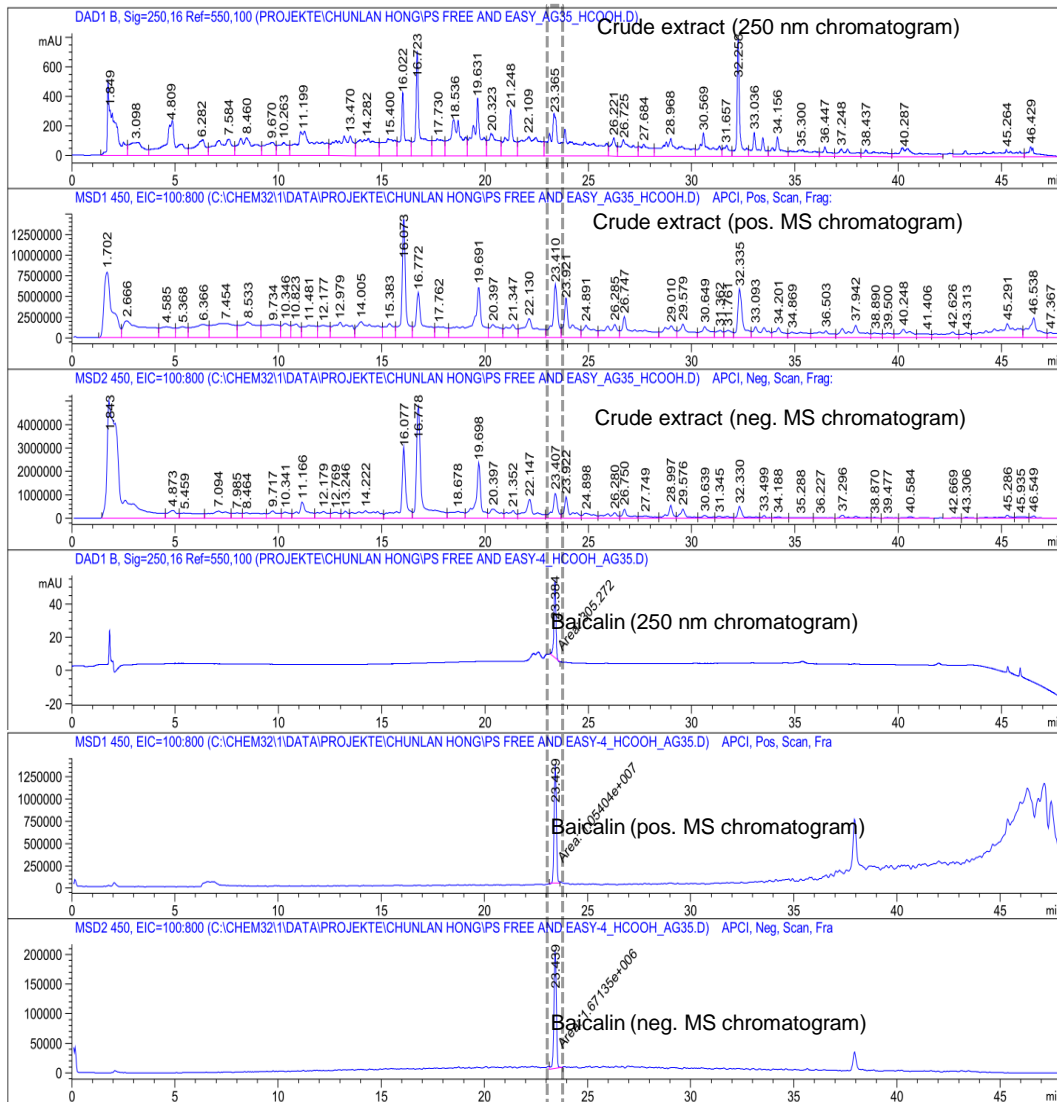

# Baicalin: MS-spectra (comparison of corresponding MS spectra)

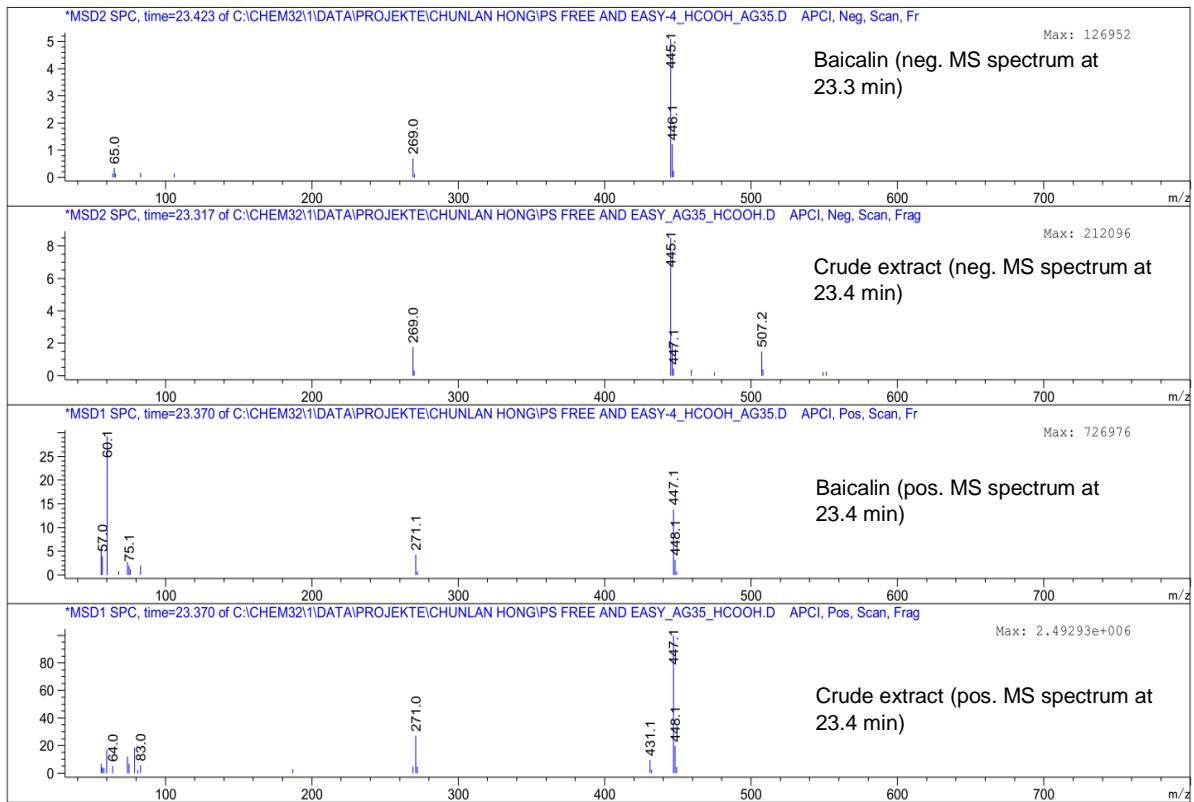

## 1.5. FAEW-5 Pentagalloyl-glucopyranose

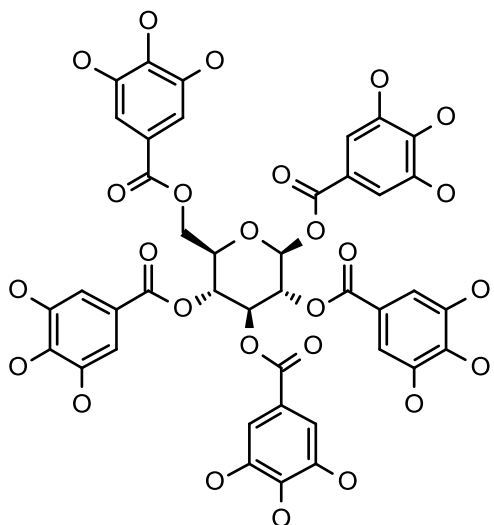

Pentagalloyl-glucopyranose  
FEW-5

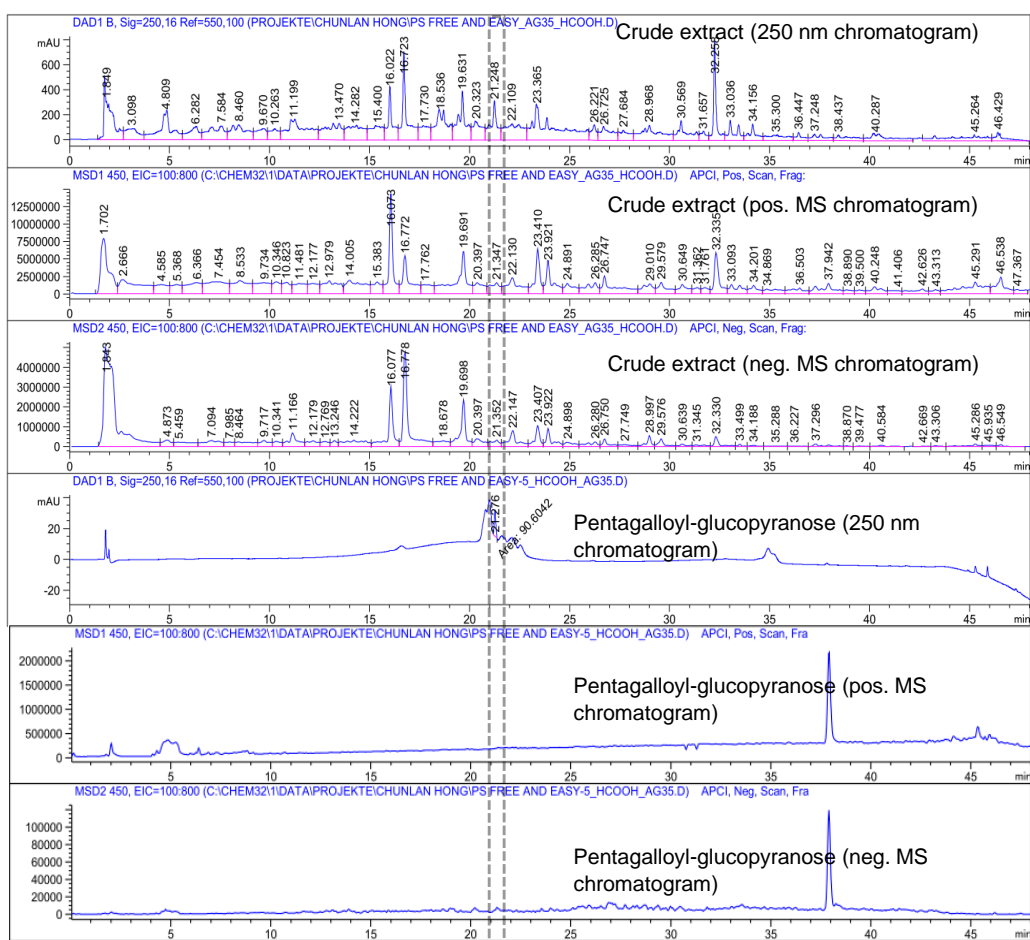

Pentagalloyl-glucopyranose: UV/vis-spectra (comparison of corresponding UV/vis spectra, no mass data was available)

DAD1, 21.231 (1502 mAU, - ) Ref=1.391 & 42.158

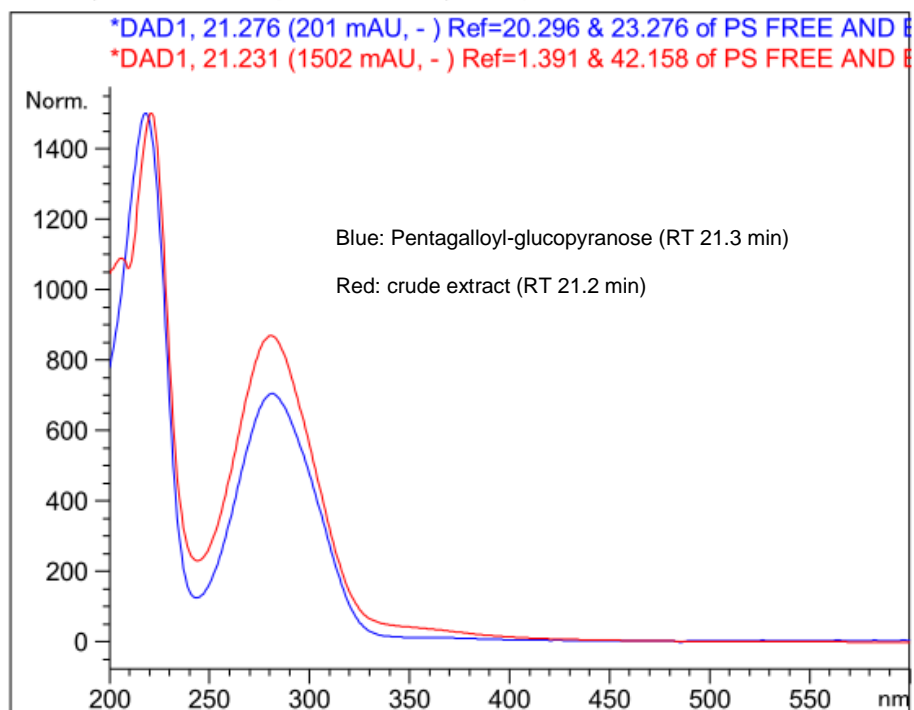



## 1.6. FAEW-6 Isoliquiritin apioside/Ononin

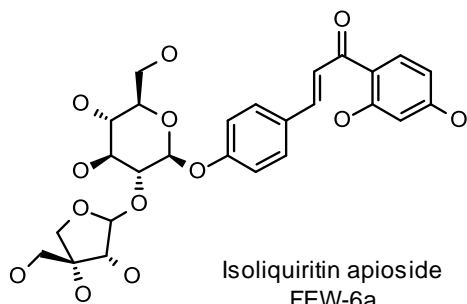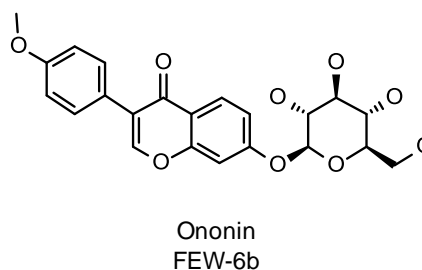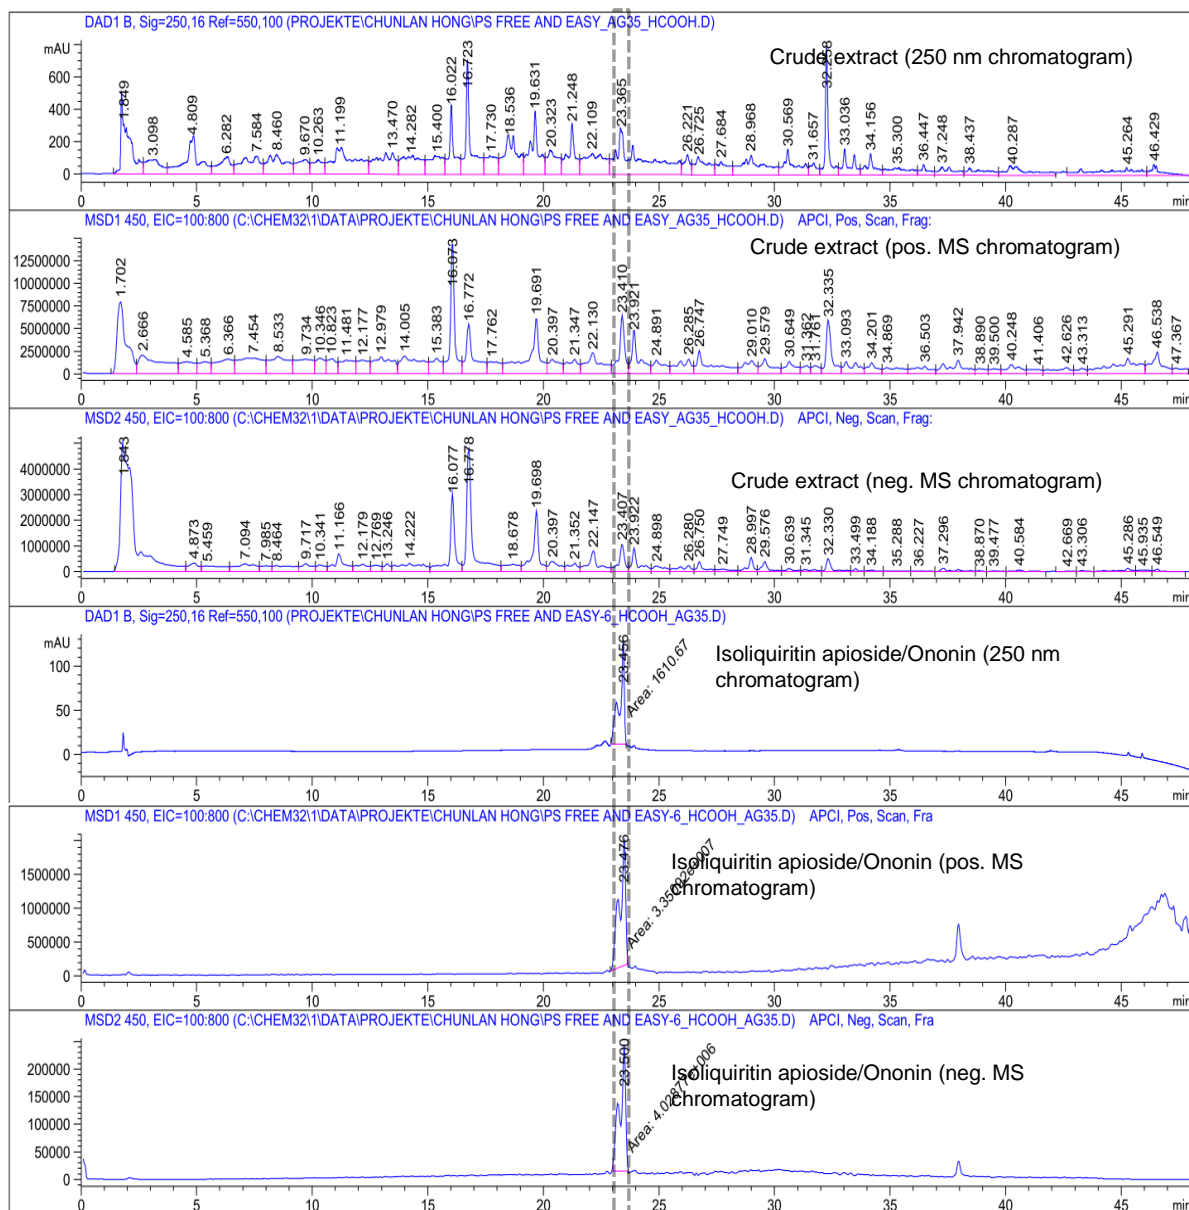

## Isoliquiritin apioside/Ononin: negative MS-spectrum (comparison of corresponding MS spectrum)

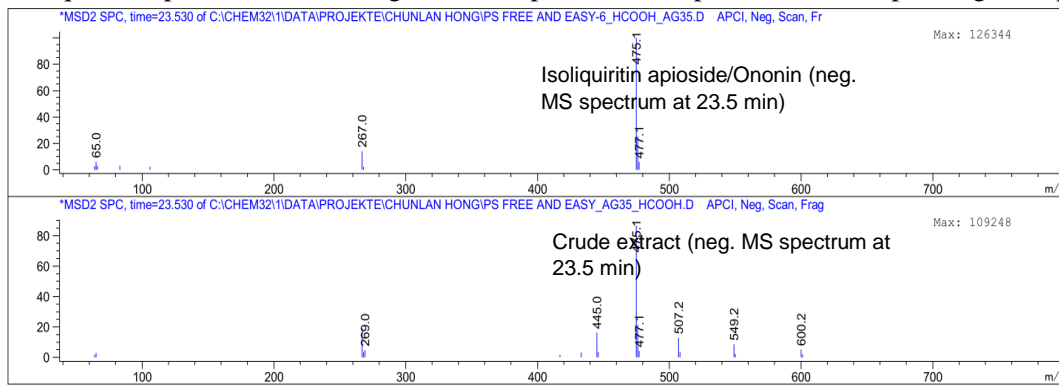

## 1.7. FAEW-7 Isoliquiritin

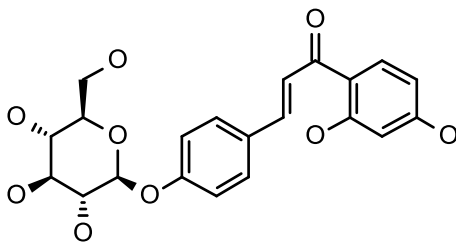

Isoliquiritin  
FEW-7

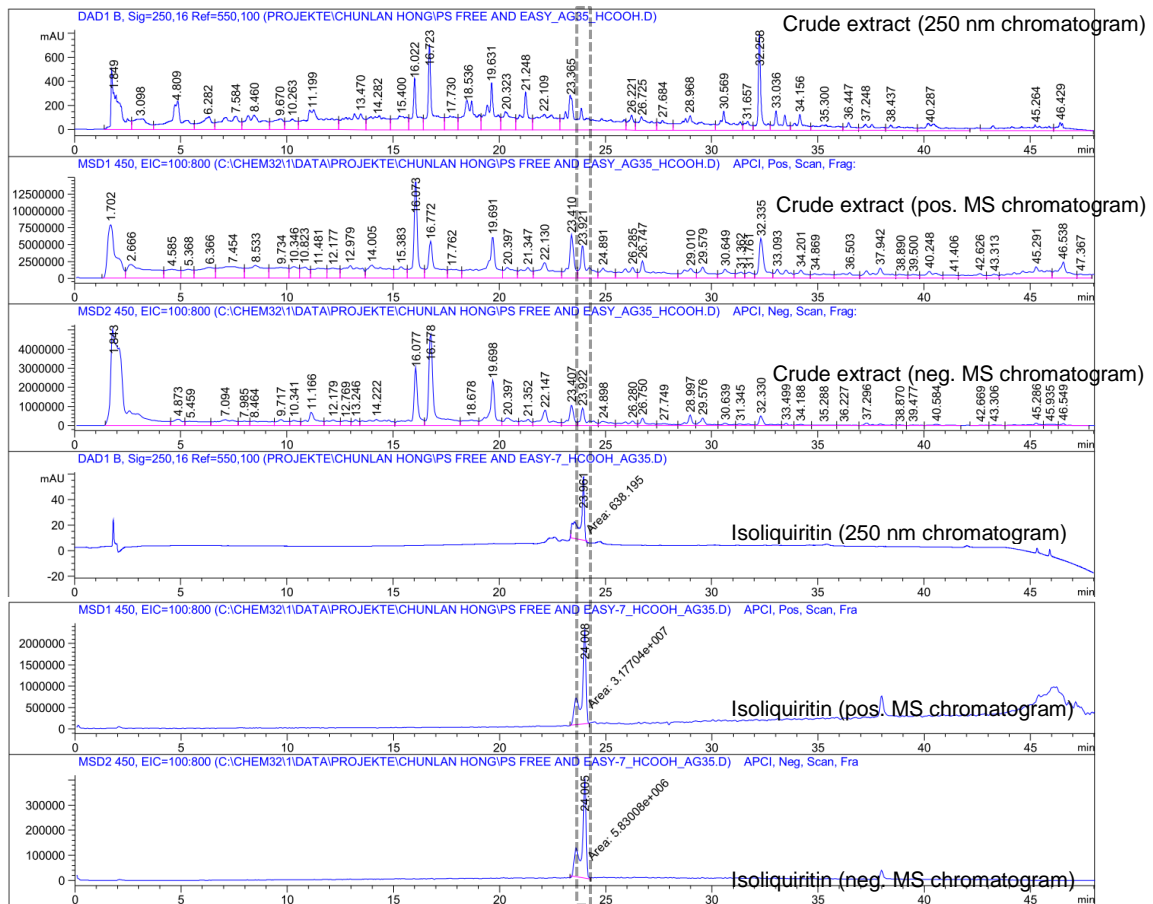

### Isoliquiritin: MS-spectra (comparison of corresponding MS spectra)

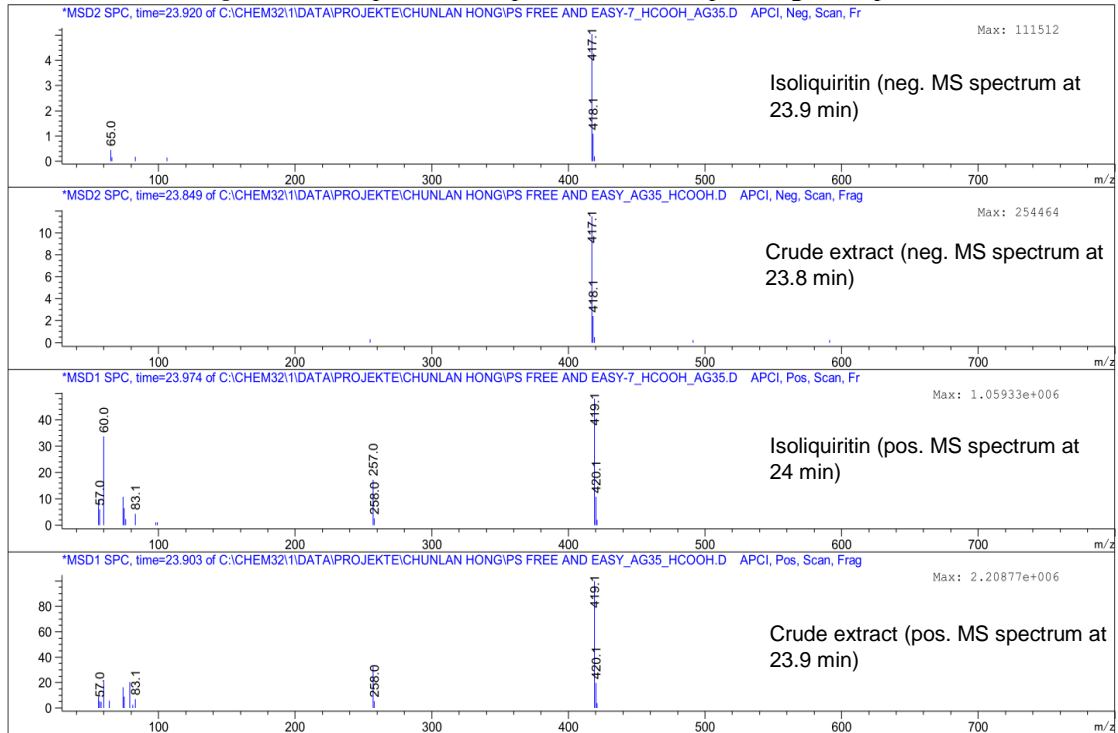

## 1.8. FAEW-8 $\beta$ -Hydroxy-DHP

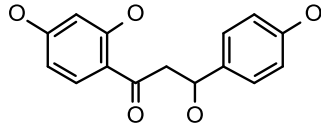

$\beta$ -Hydroxy-DHP  
FEW-8

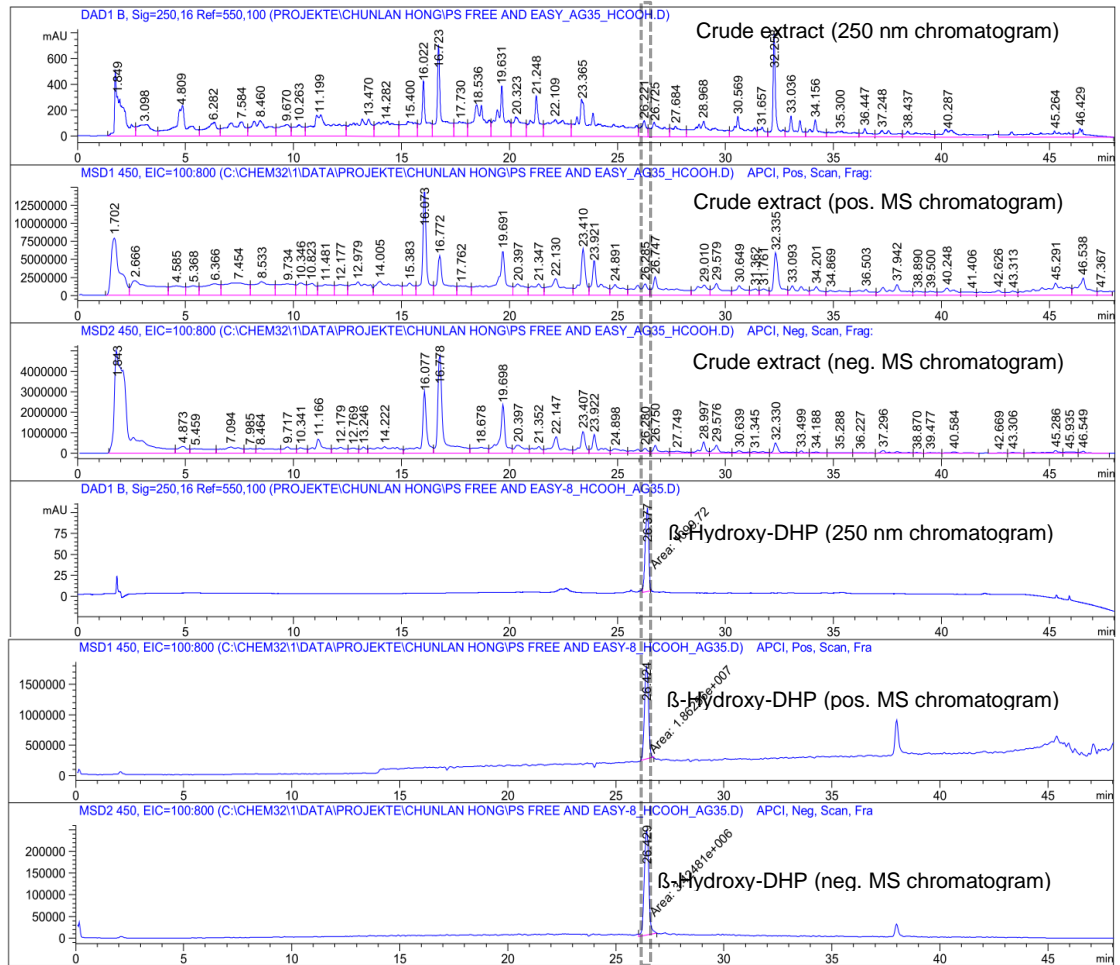

□-Hydroxy-DHP: MS-spectra (comparison of corresponding MS spectra)

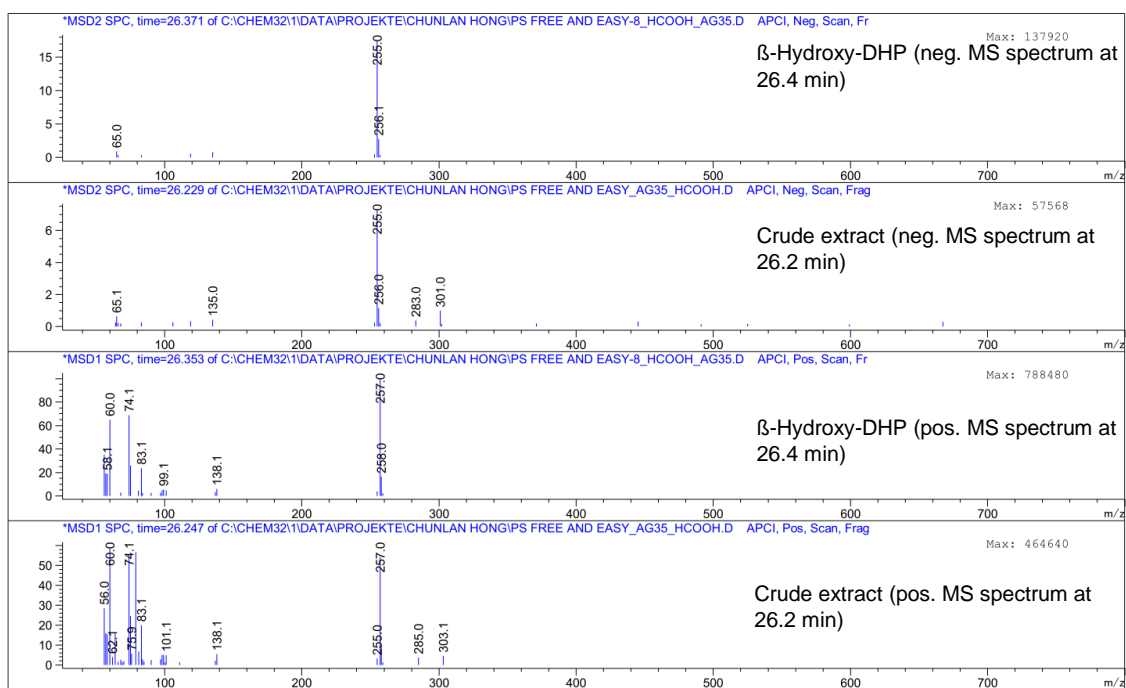

## 1.9. FAEW-9 Oroxyloside

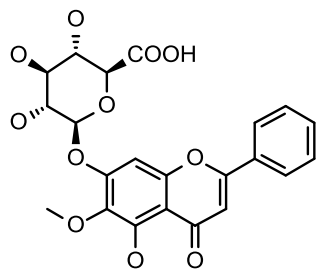

Oroxyloside  
FEW-9

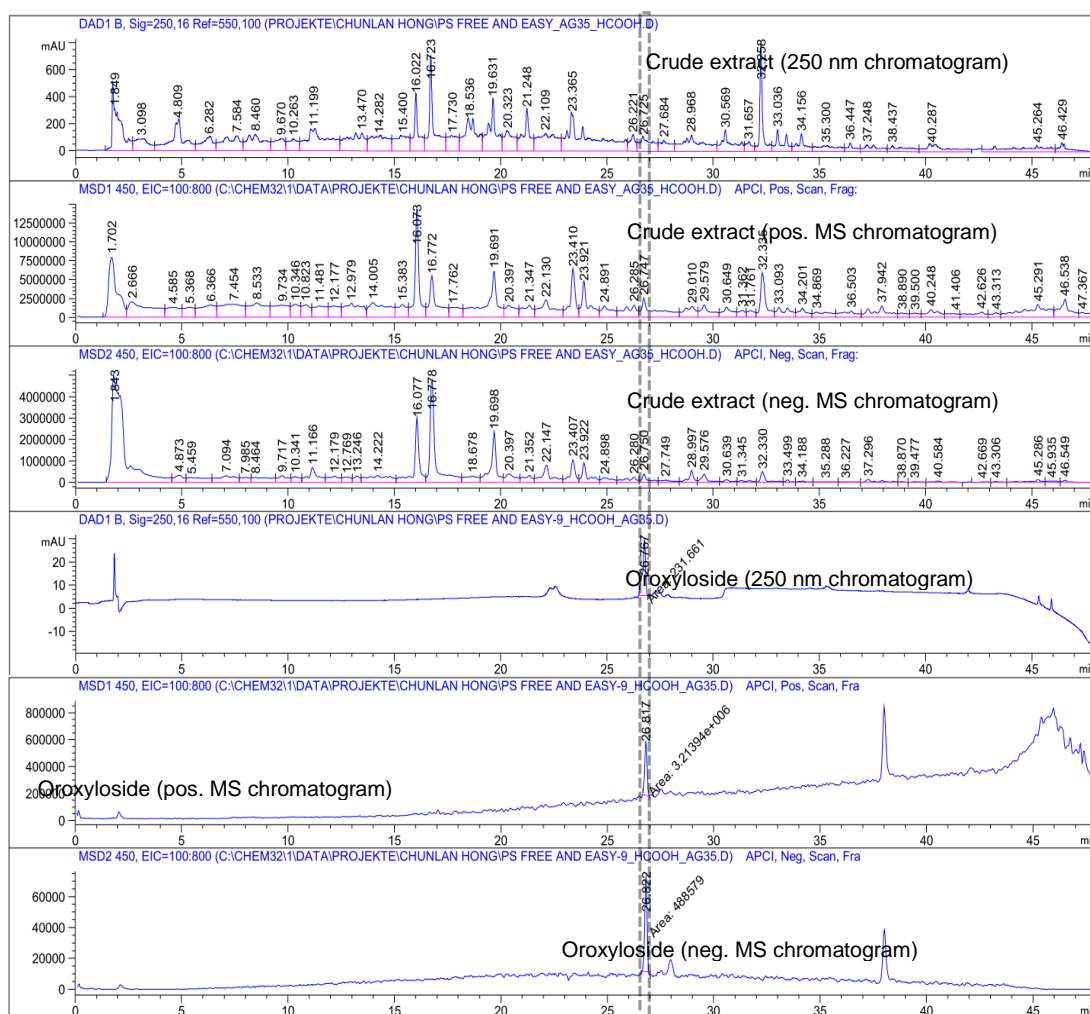

Oroxyloside: MS-spectra (comparison of corresponding MS spectra)

## 2 Structure identification

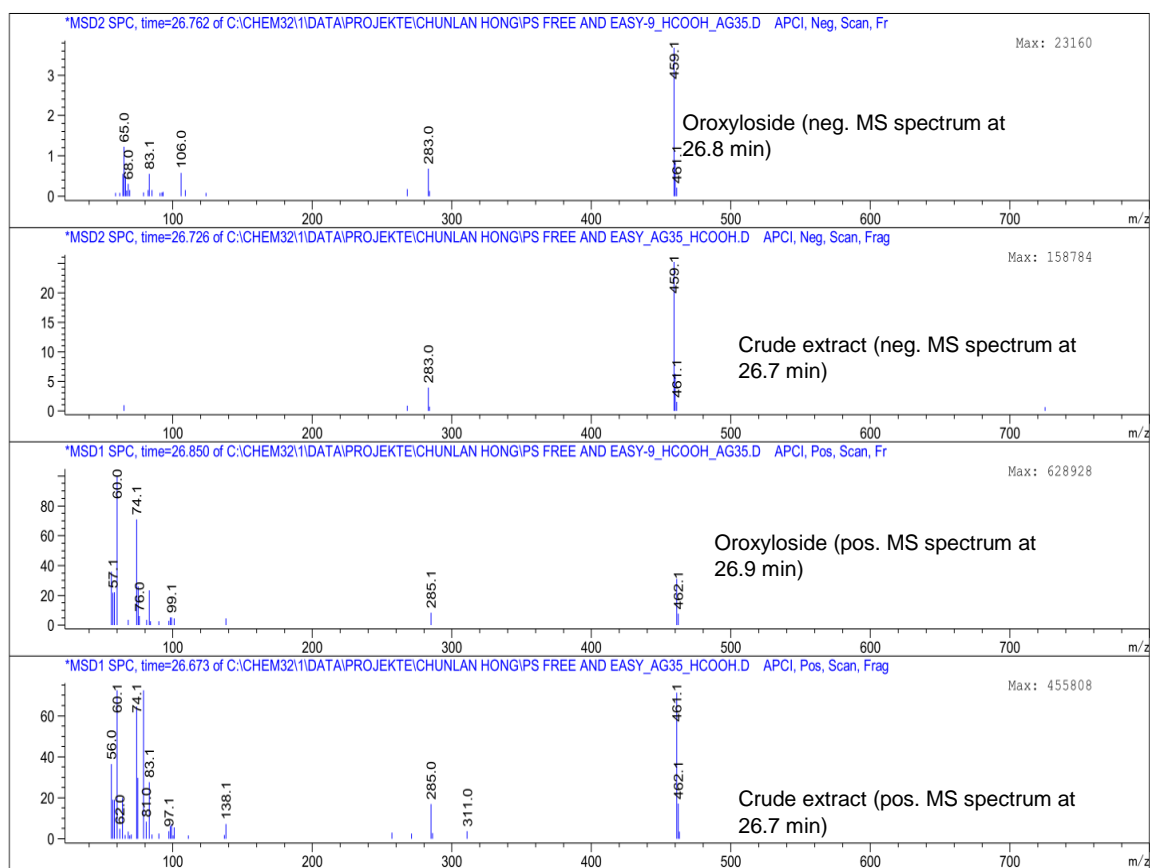

### 2.1 FAEW-1

Brown oil,  $[\alpha]_D^{29} = -7.3$  ( $c = 0.07$ , MeOH), ESI-MS  $m/z = 481.2$   $[M+H]^+$ , HR-ESI-MS  $m/z = 503.1529$  calculated for  $[C_{23}H_{28}O_{11}+Na]^+$ ; found: 503.1546.

$^1H$  NMR, COSY (600 MHz, Methanol- $d_4$ )  $\delta$  8.11 – 8.07 (m, 2H, H-2''/H-6''), 7.64 – 7.60 (m, 1H, H-4''), 7.52 – 7.48 (m, 2H, H-3''/H-5''), 4.80 (d,  $J = 12.2$  Hz, 1H, H-8), 4.68 (d,  $J = 12.2$  Hz, 1H, H-8), 4.53 (d,  $J = 7.6$  Hz, 1H, H-1'), 4.27 (dd,  $J = 6.6, 4.9$  Hz, 1H, H-4), 3.85 (dd,  $J = 11.8, 1.5$  Hz, 1H, H-6'), 3.61 – 3.58 (m, 1H, H-6'), 3.27 – 3.24 (m, 1H, H-3'), 3.24 – 3.19 (m, 3H, H-2', H-4', H-5'), 2.92 (dd,  $J = 7.8, 4.9$  Hz, 1H, H-5), 2.80 (dd,  $J = 11.0, 7.8$  Hz, 1H, H-7), 2.41 (dd,  $J = 15.4, 6.6$  Hz, 1H, H-3), 2.05 (d,  $J = 11.0$  Hz, 1H, H-7), 2.00 (dd,  $J = 15.4, 1.5$  Hz, 1H, H-3), 1.52 (s, 3H, C-2-Me).

$^{13}\text{C}$  NMR, HSQC, HMBC (151 MHz, MeOD)  $\delta$  178.0 (C-9), 167.9 (C-1''-CO), 134.4 (C-4''), 131.2 (C-1'), 130.8 (C-2''/C-6''), 129.7 (C-3''/C-5''), 100.1 (C-1'), 93.5 (C-2), 86.9 (C-1), 78.2 (C-5'), 78.0 (C-3'), 74.8 (C-2'), 71.6 (C-4'), 68.4 (C-4), 62.8 (C-6'), 62.0 (C-8), 56.9 (C-6), 41.7 (C-5), 41.6 (C-3), 28.5 (C-7), 20.6 (C-2-Me).

## 2.2. FAEW-2

Brown oil,  $[\alpha]_{\text{D}}^{29} = -23.2$  ( $c = 0.17$ , MeOH), ESI-MS  $m/z = 503.2$   $[\text{M}+\text{Na}]^+$ , HR-ESI-MS  $m/z = 503.1529$  calculated for  $[\text{C}_{23}\text{H}_{28}\text{O}_{11}+\text{Na}]^+$ ; found: 503.1523

$^1\text{H}$  NMR, COSY (600 MHz, Methanol- $d_4$ )  $\delta$  8.09 – 8.04 (m, 2H, H-2''/H-6''), 7.66 – 7.60 (m, 1H, H-4''), 7.52 – 7.48 (m, H-3''/H-5''), 5.42 (s, 1H, H-9), 4.78 – 4.72 (m, 2H, H-8), 4.53 (d,  $J = 7.7$  Hz, 1H, H-1'), 3.85 (dd,  $J = 11.9, 1.5$  Hz, 1H, H-6'), 3.63 – 3.58 (m, 1H, H-6'), 3.31 (m, 1H, H-3'), 3.25 – 3.20 (m, 3H, H-2', H-4', H-5'), 2.62 – 2.57 (m, 1H, H-5), 2.50 (dd,  $J = 11.0, 6.9$  Hz, 1H, H-7), 2.20 (d,  $J = 12.6$  Hz, 1H, H-3), 1.96 (d,  $J = 11.0$  Hz, 1H, H-7), 1.81 (d,  $J = 12.6$ , 1H, H-3), 1.37 (s, 3H, C-2-Me).

$^{13}\text{C}$  NMR, HSQC, HMBC (151 MHz, MeOD)  $\delta$  167.95 (C-1''-CO), 134.43 (C-4''), 131.21 (C-1'), 130.68 (C-2''/C-6''), 129.64 (C-3''/C-5''), 106.40 (C-4), 102.30 (C-9), 100.19 (C-1'), 89.33 (C-1), 87.25 (C-2), 78.05 (C-3'), 77.98 (C-5'), 75.01 (C-2'), 72.25 (C-6), 71.74 (C-4'), 62.87 (C-6'), 61.70 (C-8), 44.53 (C-3), 43.95 (C-5), 23.40 (C-7), 19.61 (C-2-Me).

## 2.3. FAEW-3

Yellow oil,  $[\alpha]_{\text{D}}^{29} = -41.8$  ( $c = 0.10$ , MeOH), ESI-MS  $m/z = 441.1$   $[\text{M}+\text{Na}]^+$ , HR-ESI-MS  $m/z = 441.1161$  calculated for  $[\text{C}_{21}\text{H}_{22}\text{O}_9+\text{Na}]^+$ ; found: 441.1169

$^1\text{H}$  NMR, COSY (600 MHz, Methanol- $d_4$ )  $\delta$  7.74 (d,  $J = 8.7$  Hz, 1H, H-5), 7.48 – 7.39 (m, 2H, H-2'/H-6'), 7.16 – 7.13 (m, 2H, H-3'/H-5'), 6.51 (dd,  $J = 8.7, 2.3$  Hz, 1H, H-6), 6.37 (d,  $J = 2.3$  Hz, 1H, H-8), 5.49 – 5.43 (m, 1H, H-2), 4.95 – 4.93 (m, 1H, H-1''), 3.98 – 3.91 (m, 1H, H-6''), 3.70 (dd,  $J = 12.1, 5.8$  Hz, 1H, H-6''), 3.49 – 3.43 (m, 3H, H-3'', H-2'', H-5''), 3.41 –



3.37 (m, 1H, H-4<sup>''</sup>), 3.05 (dd,  $J = 16.9, 12.9$  Hz, 1H, H-3), 2.74 (dd,  $J = 16.9, 3.0$  Hz, 1H, H-3).

<sup>13</sup>C NMR, HSQC, HMBC (151 MHz, MeOD)  $\delta$  193.19 (C-4), 166.82 (C-7), 165.42 (C-8a), 159.25 (C-4<sup>'</sup>), 134.44 (C-1<sup>'</sup>), 129.87 (C-5), 128.78 (C-2<sup>'</sup>/C-6<sup>'</sup>), 117.78, 117.76 (C-3<sup>'</sup>/C-5<sup>'</sup>), 115.00 (C-4a), 111.80 (C-6), 103.81 (C-8), 102.17 (C-1<sup>''</sup>), 80.74 (C-2), 78.19 (C-5<sup>''</sup>), 77.97 (C-3<sup>''</sup>), 74.89 (C-2<sup>''</sup>), 71.35 (C-4<sup>''</sup>), 62.48 (C-6<sup>''</sup>), 45.00 (C-3).

#### 2.4. FAEW-4

Yellow oil,  $[\alpha]_D^{29} = -46.0$  ( $c = 0.05$ , H<sub>2</sub>O), ESI-MS  $m/z = 447.1$  [M+H]<sup>+</sup>, HR-ESI-MS  $m/z = 469.0747$  calculated for [C<sub>21</sub>H<sub>18</sub>O<sub>11</sub>+Na]<sup>+</sup>; found: 469.0744

<sup>1</sup>H NMR, COSY (600 MHz, Deuterium Oxide)  $\delta$  7.86 (br, 1H, H-2<sup>'</sup>/H-6<sup>'</sup>), 7.53 (br, 1H, H-4<sup>'</sup>), 7.47 (br, 2H, H-3<sup>'</sup>/H-5<sup>'</sup>), 6.90 (s, 1H, H-8), 6.69 (s, 1H, H-3), 5.19 (d,  $J = 7.7$  Hz, 1H, H-1<sup>''</sup>), 3.96 (d,  $J = 9.5$  Hz, 1H, H-5<sup>''</sup>), 3.72 (t,  $J = 8.5$  Hz, 1H, H-2<sup>''</sup>), 3.69 – 3.65 (m, 1H, H-3<sup>''</sup>), 3.62 (t,  $J = 9.5$  Hz, H-4<sup>''</sup>).

<sup>13</sup>C NMR, HSQC, HMBC (151 MHz, D<sub>2</sub>O)  $\delta$  175.18 (COOH), 150.26 (C-7 or 8a), 132.08 (C-4<sup>'</sup>), 128.94 (C-3<sup>'</sup>/C-5<sup>'</sup>), 126.25 (C-2<sup>'</sup>/C-6<sup>'</sup>), 106.55 (C-4a), 104.17 (C-3), 99.73 (C-1<sup>''</sup>), 94.29 (C-8), 76.48 (C-5<sup>''</sup>), 74.94 (C-3<sup>''</sup>), 72.39 (C-2<sup>''</sup>), 71.59 (C-4<sup>''</sup>).

#### 2.5. FAEW-5

Brown oil,  $[\alpha]_D^{29} = +17.4$  ( $c = 0.13$ , MeOH), ESI-MS  $m/z = 941.1$  [M+H]<sup>+</sup>, HR-ESI-MS  $m/z = 963.1079$  calculated for [C<sub>41</sub>H<sub>32</sub>O<sub>26</sub>+Na]<sup>+</sup>; found: 963.1052

<sup>1</sup>H NMR, COSY (600 MHz, Methanol-*d*<sub>4</sub>)  $\delta$  7.11 (s, 2H, H-2e/H-6e), 7.05 (s, 1H, H-2a/H-6a), 6.98 (s, 2H, H-2d/H-6d), 6.95 (s, 2H, H-2b/H-6b), 6.90 (s, 2H, H-2c/H-6c), 6.24 (d,  $J = 8.3$  Hz, 1H, H-1), 5.91 (t,  $J = 9.7$  Hz, 1H, H-3), 5.64 – 5.57 (m, 2H, H-4, H-2), 4.51 (dd,  $J = 12.3, 1.9$  Hz, 1H, H-6), 4.43 – 4.36 (m, 2H, H-5, H-6).

<sup>13</sup>C NMR, HSQC, HMBC (151 MHz, MeOD)  $\delta$  167.91 (C-1e-CO), 167.28 (C-1c-CO), 167.01 (C-1b-CO), 166.91 (C-1d-CO), 166.20 (C-1a-CO), 146.54 (C-3a/C-5a), 146.47 (C-3e/C-5e),

146.43 (C-3d/C-5d), 146.37 (C-3b/C-5b), 146.27 (C-3c/C-5c), 140.75 (C-4a), 140.34 (C-4d), 140.29 (C-4b), 140.11 (C-4c), 140.00 (C-4e), 121.01 (C-1e), 120.33 (C-1c), 120.21 (C-1d), 120.17 (C-1b), 119.70 (C-1a), 110.58 (C-2a/C-6a), 110.43 (C-2d/C-6d), 110.37 (C-2b/C-6b), 110.34 (C-2c/C-6c), 110.30 (C-2e/C-6e), 93.80 (C-1), 74.40 (C-5), 74.10 (C-3), 72.17 (C-2), 69.77 (C-4), 63.10 (C-6).

## 2.6. FAEW-6

Brown oil, ESI-MS  $m/z = 551.3$   $[M+H]^+$ , HR-ESI-MS  $m/z = 573.1584$  calculated for  $[C_{26}H_{30}O_{13}+Na]^+$ ; found: 573.1595

$^1H$  NMR, COSY (600 MHz, Methanol- $d_4$ )  $\delta$  8.00 (d,  $J = 8.9$  Hz, 1H, H-6 $^{\prime}$ ), 7.82 (d,  $J = 15.3$  Hz, 1H, H-3), 7.75 – 7.69 (m, 3H, H-2 $^{\prime\prime}$ /H-6 $^{\prime\prime}$ , H-2), 7.15 – 7.12 (m, 2H, H-3 $^{\prime\prime}$ /H-5 $^{\prime\prime}$ ), 6.43 (dd,  $J = 8.9, 2.4$  Hz, 1H, H-5 $^{\prime}$ ), 6.30 (d,  $J = 2.4$  Hz, 1H, H-3 $^{\prime}$ ), 5.47 (d,  $J = 1.6$  Hz, 1H, H-1 $^{iv}$ ), 5.06 (d,  $J = 7.6$  Hz, 1H, H-1 $^{v}$ ), 4.06 (d,  $J = 9.6$  Hz, 1H, H-4 $^{iv}$ ), 3.95 (d,  $J = 1.6$  Hz, 1H, H-2 $^{iv}$ ), 3.94 – 3.89 (m, 1H, H-6 $^{v}$ ), 3.81 (d,  $J = 9.6$  Hz, 1H, H-4d), 3.74 – 3.69 (m, 1H, H-6 $^{v}$ ), 3.67 (dd,  $J = 9.0$  Hz, 7.6 Hz, 1H, H-2c), 3.62 (t,  $J = 9.0$  Hz, 1H, H-3c), 3.58 – 3.54 (m, 1H, H-5 $^{v}$  or H-5 $^{\prime\prime}$  Ononin), 3.54 (d,  $J = 2.1$  Hz, 2H, H-5 $^{iv}$ ), 3.50 – 3.46 (m, 1H, H-5 $^{v}$  or H-5 $^{\prime\prime}$  Ononin), 3.43 – 3.38 (m, 1H, H-4 $^{v}$ ).

$^{13}C$  NMR, HSQC, HMBC (151 MHz, MeOD)  $\delta$  193.36 (C-1), 167.61 (C-2 $^{\prime}$ ), 166.54 (C-4 $^{\prime}$ ), 160.95 (C-4 $^{\prime\prime}$ ), 144.82 (C-3), 133.50 (C-6 $^{\prime}$ ), 131.46 (C-2 $^{\prime\prime}$ /C-6 $^{\prime\prime}$ ), 130.49 (C-1 $^{\prime\prime}$ ), 120.03 (C-2), 117.84 (C-3 $^{\prime\prime}$ /C-5 $^{\prime\prime}$ ), 114.67 (C-1 $^{\prime}$ ), 110.82 (C-1 $^{iv}$ ), 109.20 (C-5 $^{\prime}$ ), 103.79 (C-3 $^{\prime}$ ), 100.43 (C-1 $^{\prime\prime}$ ), 80.76 (C-3 $^{iv}$ ), 78.60 (C-3 $^{\prime\prime}$ ), 78.57 (C-2 $^{\prime\prime}$ ), 78.42 (C-5 $^{v}$  Ononin or C-5 $^{\prime\prime}$ ), 78.17 (C-5 $^{v}$  Ononin or C-5 $^{\prime\prime}$ ), 78.05 (C-2 $^{iv}$ ), 75.47 (C-4 $^{iv}$ ), 71.33 (C-4 $^{\prime\prime}$  or C-4 $^{\prime}$  Ononin), 71.23 (C-4 $^{\prime\prime}$  or C-4 $^{\prime}$  Ononin), 66.00 (C-5d $^{iv}$ ), 62.43 (C-6 $^{v}$ ).

ESI-MS  $m/z = 431.2$   $[M+H]^+$ , HR-ESI-MS  $m/z = 453.1161$  calculated for  $[C_{22}H_{22}O_9+Na]^+$ ; found: 453.1172

<sup>1</sup>H NMR, COSY (600 MHz, Methanol-*d*<sub>4</sub>) δ 8.24 (s, 1H, H-2), 8.16 (d, *J* = 8.9 Hz, 1H, H-5), 7.52 – 7.48 (m, 2H, H-2'/H-6'), 7.26 (d, *J* = 2.3 Hz, 1H, H-8), 7.23 (dd, *J* = 8.9, 2.3 Hz, 1H, H-6), 7.02 – 6.98 (m, 2H, H-3'/H-5'), 5.13 – 5.10 (m, 1H, H-1''), 3.94 – 3.89 (m, 1H, H-6''), 3.83 (s, 3H, C-4'-OMe), 3.74 – 3.69 (m, 1H, H-6''), 3.58 – 3.54 (m, 1H, H-5'' or H-5'''' FEW-6a), 3.53 – 3.51 (m, 2H, H-2'', H-3''), 3.50 – 3.46 (m, 1H, H-5'' or H-5'''' FEW-6a), 3.43 – 3.38 (m, 1H, H-4'').

<sup>13</sup>C NMR, HSQC, HMBC (151 MHz, MeOD) δ 177.97 (C-4), 163.53 (C-7), 161.20 (C-4'), 159.25 (C-8a), 155.26 (C-2), 131.37 (C-2'/C-6'), 128.30 (C-5), 125.97 (C-3), 125.29 (C-1'), 120.21 (C-4a), 117.08 (C-6), 114.86 (C-3'/C-5'), 104.94 (C-8), 101.79 (C-1''), 78.42 (C-5'' or C-5'''' FEW-6a), 78.17 (C-5'' or C-5'''' FEW-6a), 77.84 (C-3''), 74.73 (C-2''), 71.33 (C-4'' or C-4'''' FEW-6a), 71.23 (C-4'' or C-4'''' FEW-6a), 62.43 (C-6''), 55.73 (C-4'-Me).

## 2.7. FAEW-7

Brown oil,  $[\alpha]_D^{29} = -35.4$  (*c* = 0.16, MeOH), ESI-MS *m/z* = 419.2 [M+H]<sup>+</sup>, HR-ESI-MS *m/z* = 441.1161 calculated for [C<sub>21</sub>H<sub>22</sub>O<sub>9</sub>+Na]<sup>+</sup>; found: 441.1167

<sup>1</sup>H NMR, COSY (600 MHz, Methanol-*d*<sub>4</sub>) δ 8.00 (d, *J* = 9.0 Hz, 1H, H-6'), 7.82 (d, *J* = 15.4 Hz, 1H, H-3), 7.75 – 7.69 (m, 3H, H-2''/H-6'', H-2), 7.19 – 7.14 (m, 2H, H-3''/H-5''), 6.43 (dd, *J* = 9.0, 2.4 Hz, 1H, H-5'), 6.30 (d, *J* = 2.4 Hz, 1H, H-3'), 5.00 (dd, *J* = 5.4, 2.2 Hz, 1H, H-1'''), 3.91 (dd, *J* = 12.1, 2.3 Hz, 1H, H-6'''), 3.71 (dd, *J* = 12.1, 5.7 Hz, 1H, H-6'''), 3.51 – 3.46 (m, 3H, H-2''', H-3''', H-5'''), 3.43 – 3.37 (m, 1H, H-4''').

<sup>13</sup>C NMR, HSQC, HMBC (151 MHz, MeOD) δ 193.37 (C-1), 167.62 (C-2'), 166.54 (C-4'), 161.08 (C-4''), 144.83 (C-3), 133.50 (C-6'), 131.42 (C-2''/C-6''), 130.53 (C-1''), 120.03 (C-2), 117.99 (C-3''/C-5''), 114.67 (C-1'), 109.20 (C-5'), 103.78 (C-3'), 101.80 (C-1'''), 78.28 (C-5'''), 77.95 (C-3'''), 74.83 (C-2'''), 71.29 (C-4'''), 62.46 (C-6''').

## 2.8. FAEW-8

Yellow oil,  $[\alpha]_D^{29} = -8.9$  ( $c = 0.06$ , MeOH), ESI-MS  $m/z = 256.1$   $[M-H_2O + H]^+$ , HR-ESI-MS  $m/z = 279.0633$  calculated for  $[C_{15}H_{14}O_5-H_2O + Na]^+$ ; found: 279.0645

$^1H$  NMR, COSY (600 MHz, Methanol- $d_4$ )  $\delta$  7.74 (d,  $J = 8.7$  Hz, 1H, H-6), 7.35 – 7.31 (m, 2H, H-2'/H-6'), 6.86 – 6.79 (m, 2H, H-3'/H-5'), 6.50 (dd,  $J = 8.7, 2.3$  Hz, 1H, H-5), 6.36 (d,  $J = 2.3$  Hz, 1H, H-3), 5.39 (dd,  $J = 13.2, 2.9$  Hz, 1H, H- $\beta$ ), 3.06 (dd,  $J = 16.9, 13.1$  Hz, 1H, H- $\alpha$ ), 2.70 (dd,  $J = 16.9, 2.9$  Hz, 1H, H- $\alpha$ ).

$^{13}C$  NMR, HSQC, HMBC (151 MHz, MeOD)  $\delta$  193.54 (C=O), 166.79 (C-2), 165.58 (C-4), 158.99 (C-4'), 131.34 (C-1'), 129.85 (C-6), 129.02 (C-2'/C-6'), 116.28 (C-3'/C-5'), 114.97 (C-1), 111.72 (C-5), 103.79 (C-3), 81.07 (C $\beta$ ), 44.97 (C $\alpha$ ).

## 2.9. FAEW-9

Brown oil,  $[\alpha]_D^{29} = -10.0$  ( $c = 0.05$ , MeOH), ESI-MS  $m/z = 461.2$   $[M+H]^+$ , HR-ESI-MS  $m/z = 483.0903$  calculated for  $[C_{22}H_{20}O_{11}+Na]^+$ ; found: 483.0923

$^1H$  NMR, COSY (600 MHz, Methanol- $d_4$ )  $\delta$  8.07 (d,  $J = 7.4$  Hz, 2H, H-2'/H-6'), 7.64 – 7.57 (m, 2H, H-3'/H-5'), 6.85 (s, 1H, H-3), 6.67 (s, 1H, H-8), 5.21 (d,  $J = 7.3$  Hz, 1H, H-1''), 4.06 (d,  $J = 7.8$  Hz, H-5''), 3.99 (s, 3H, C-6-OMe), 3.67 – 3.59 (m, 2H, H-2'', H-4''), 3.58 – 3.52 (m, 1H, H-3'').

$^{13}C$  NMR, HSQC, HMBC (151 MHz, MeOD)  $\delta$  184.32 (C-4), (C6'' not observed), 165.97 (C-2), 158.11 (C-7), 157.73 (C-5), 151.14 (C-8a), 133.34 (C-4'), 132.48 (C-1'), 131.27 (C-6), 130.35 (C-3'/C-5'), 127.57 (C-2'/C-6'), 107.23 (C-4a), 106.20 (C-3), 101.84 (C-1''), 100.34 (C-8), 77.40 (C-3''), 76.67 (C-5''), 74.51 (C-2''), 72.93 (C-4''), 62.50 (C-6-OMe).

# Methods for the image of blotting

- Protocols: After the protein was transferred from the gel to the membrane, Ponceau S was used to check whether transfer was successful, with the help of marker, we can see the bands of the proteins very clear, then the membranes were cropped to different parts, as NRF2 (97-100), KEAP1 (60-64), HO-1 (28),  $\beta$ -actin (43), LaminA/C (Lamin A: 74, Lamin C: 63) and TBP (38) were located in different parts of the membranes. Each protein was measured separately after incubating the substrate in dark for 1-2 min.
- Instrument: FluorChem<sup>®</sup> Q from Biozym Scientific GmbH
- Substrate: luminata<sup>™</sup> Classico Western HRP substrate or Western Bright Chemilumineszenz Substrate Sirius

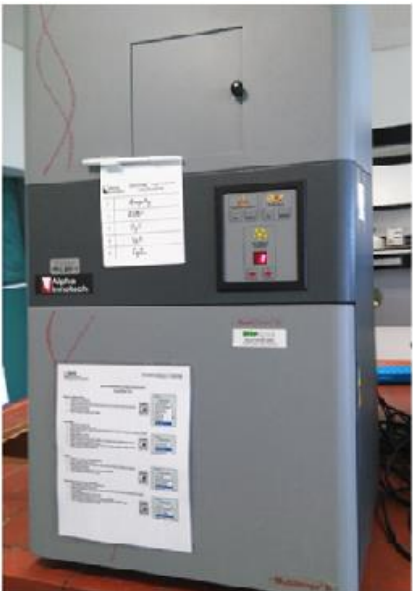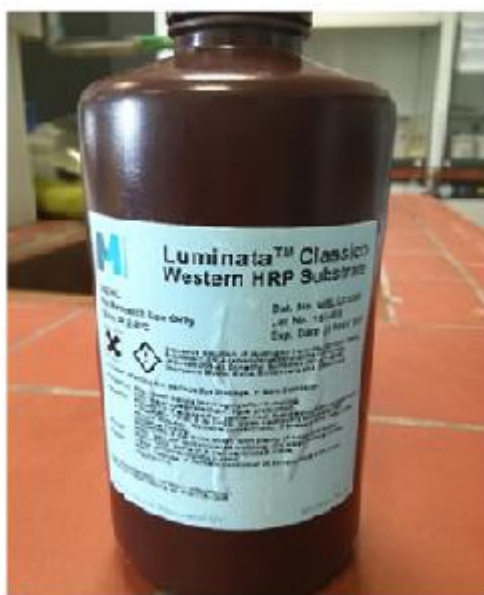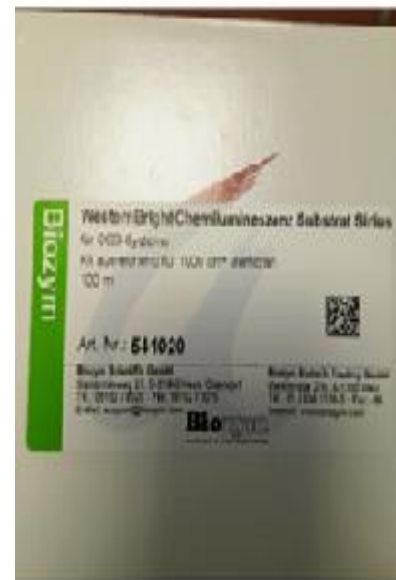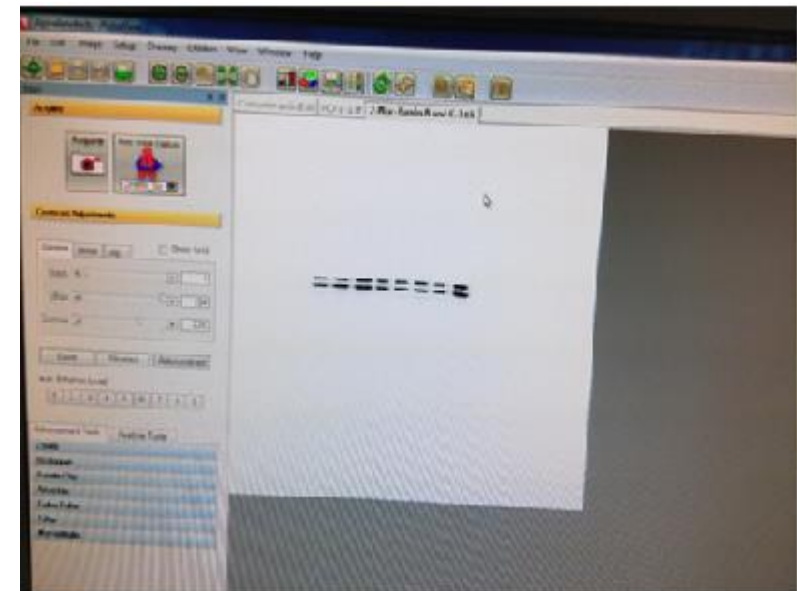

# T98G cell line-24 h H<sub>2</sub>O<sub>2</sub>

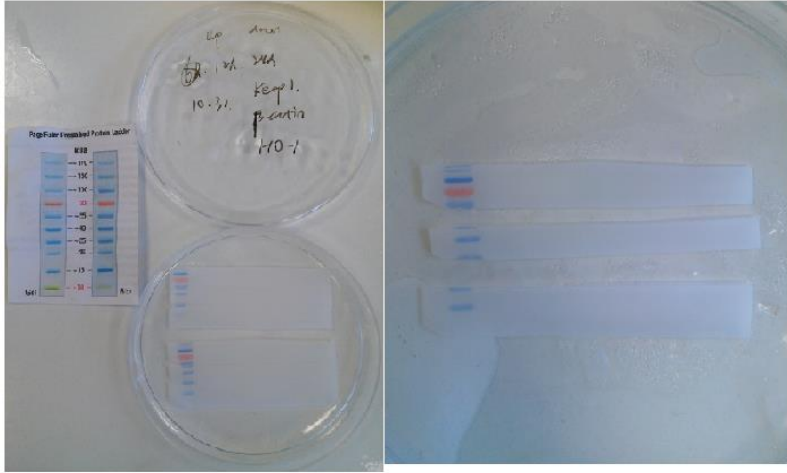

**KEAP1**  
**β-actin**  
**HO-1**

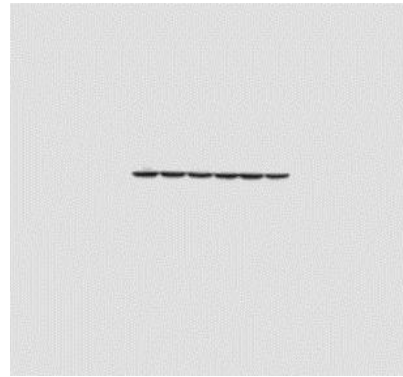

beta-actin-24h

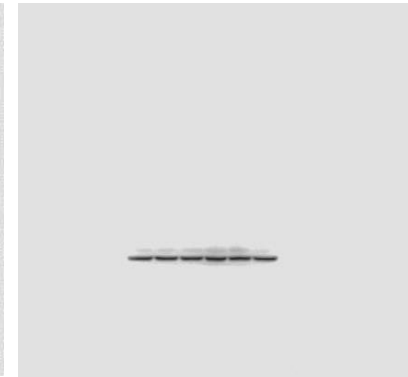

CAT-24h

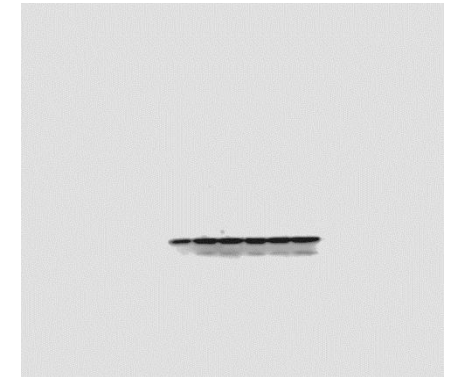

HO-1-24h

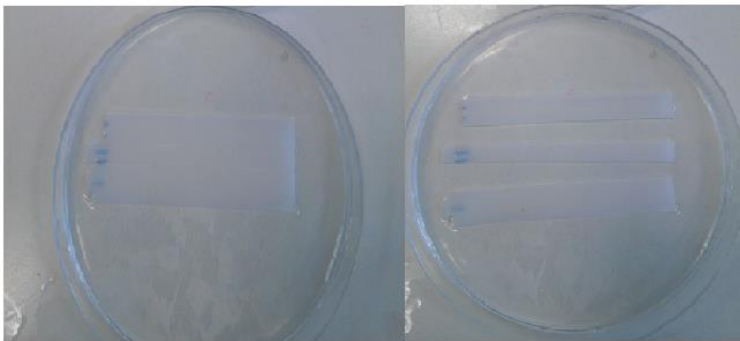

**N-NRF2**  
**Lamin A/C**  
**TBP**

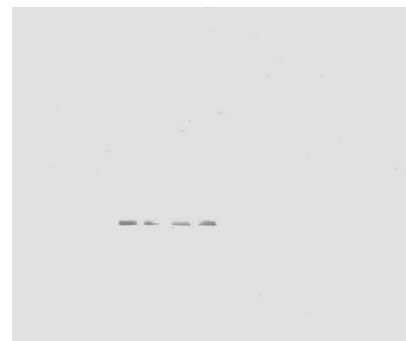

KEAP1-24h

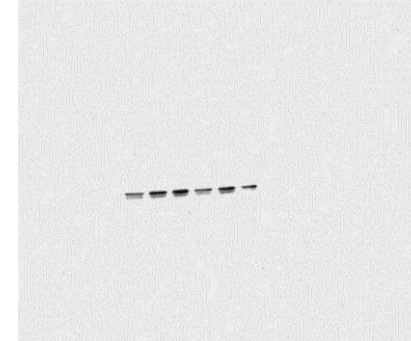

NRF2-24h

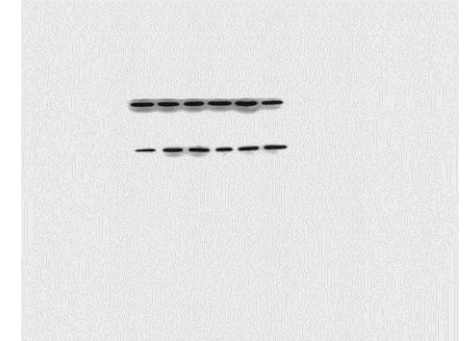

TBP-24h-up



# T98G cell line-12 h H<sub>2</sub>O<sub>2</sub>

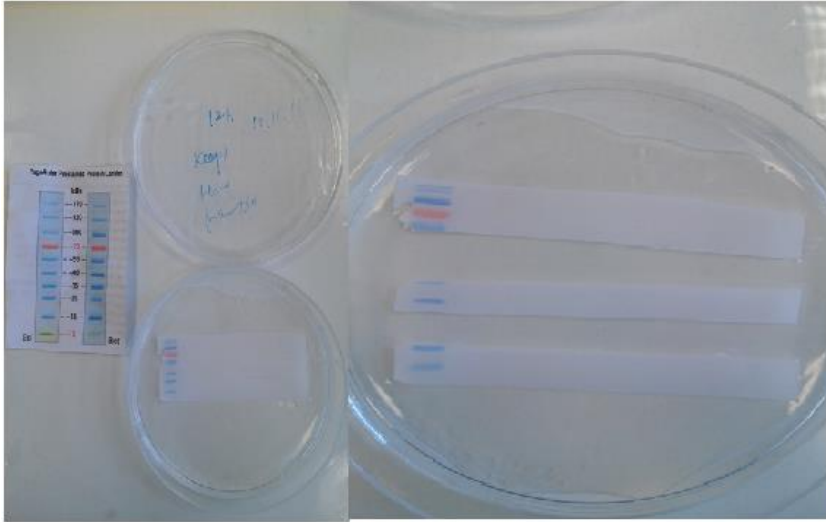

**KEAP1**  
**β-actin**  
**HO-1**

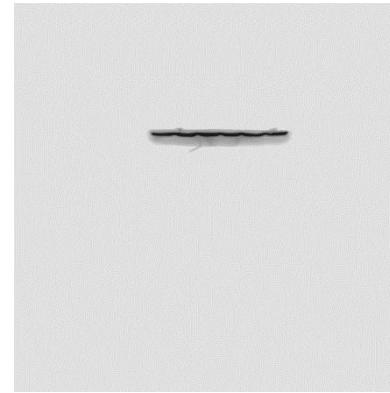

ACTIN-12h

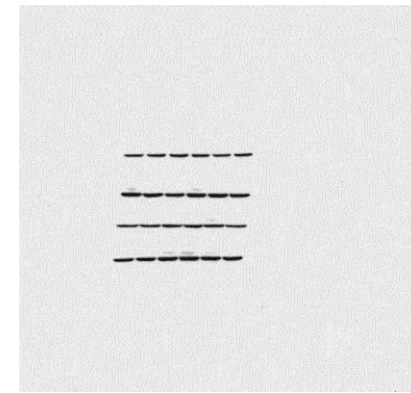

CAT-12h-the second one

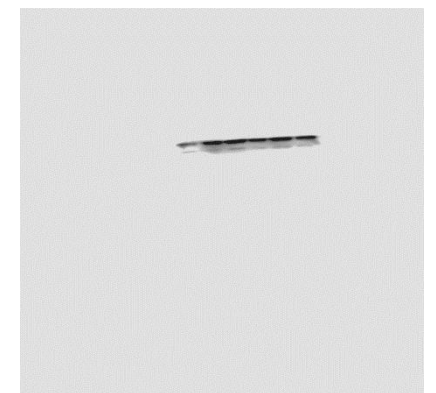

HO-1-12h

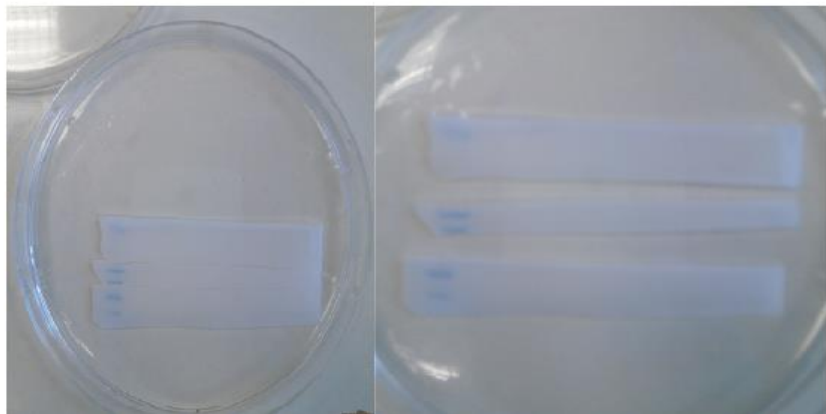

**N-NRF2**  
**Lamin A/C**  
**TBP**

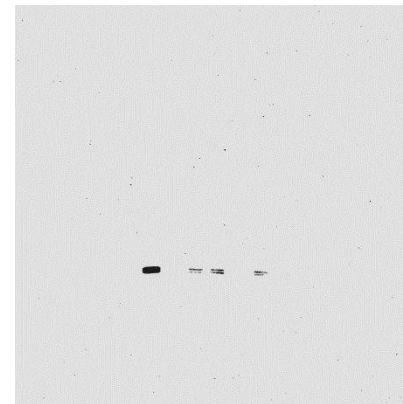

KEAP1-12h

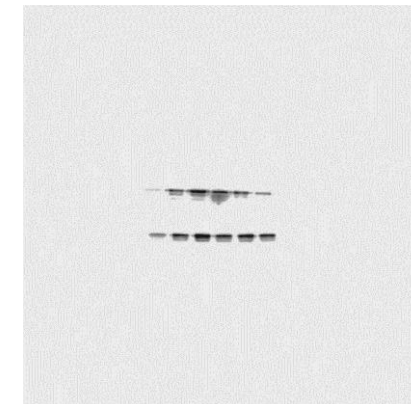

NRF2-12h-UP

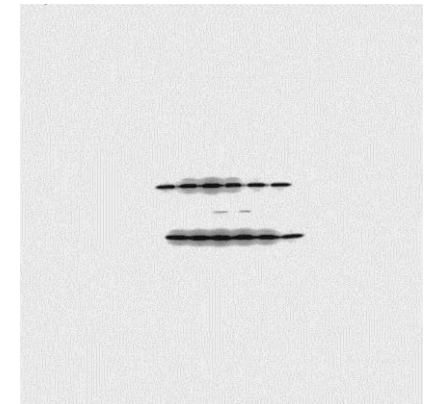

TBP-12h-UP

# T98G cell line-6h H<sub>2</sub>O<sub>2</sub>

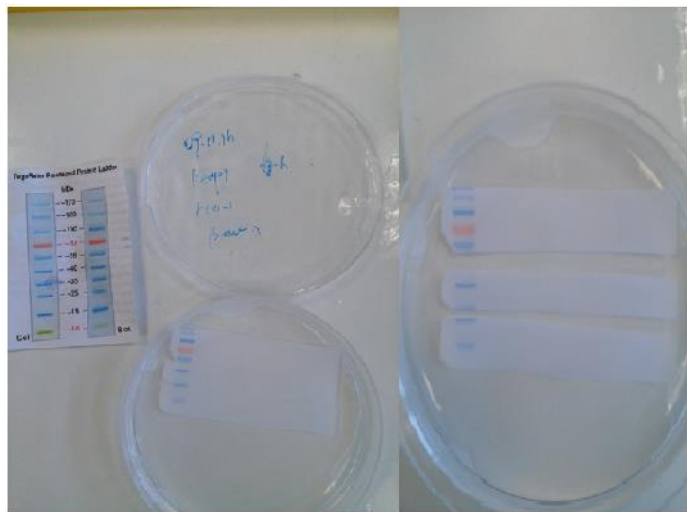

**KEAP1**  
**β-actin**  
**HO-1**

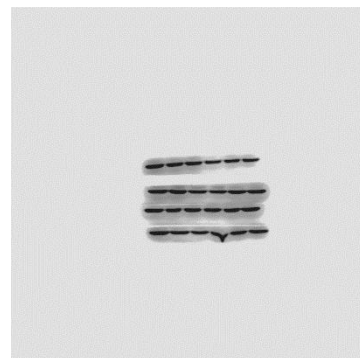

actin-6h-the third one

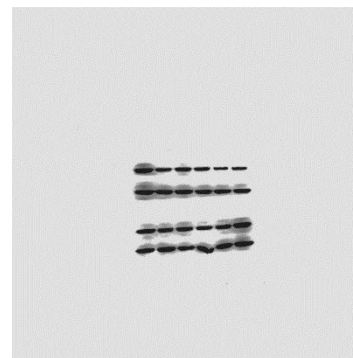

CAT-6h-the third one

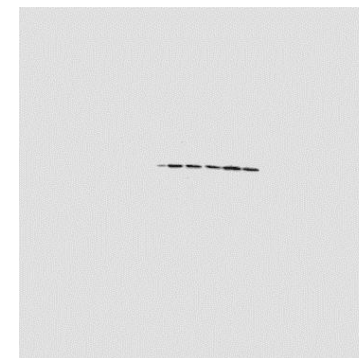

HO-1-6h

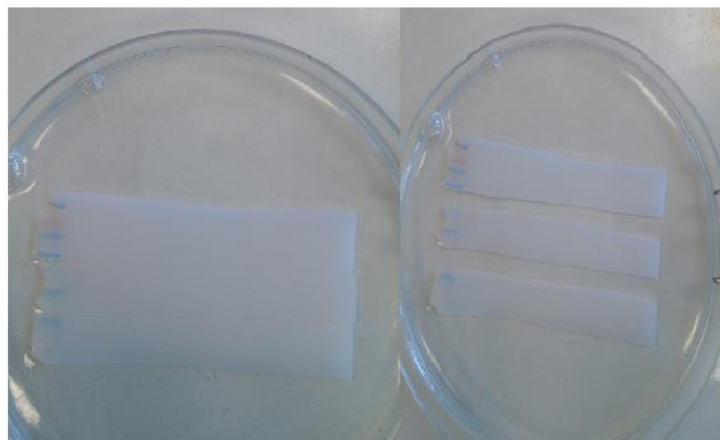

**N-NRF2**  
**TBP**  
**Histone**

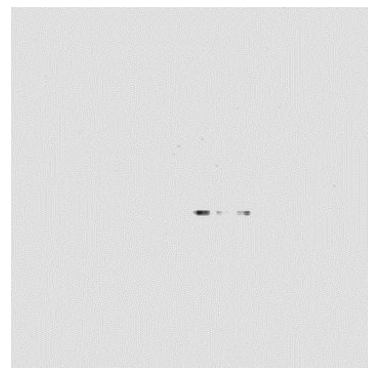

KEAP1-6h

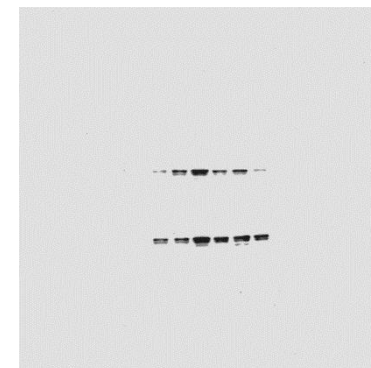

NRF2-6h-down

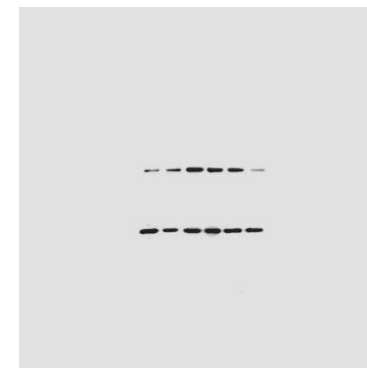

TBP-6h-down



# T98G cell line-10 min H<sub>2</sub>O<sub>2</sub>

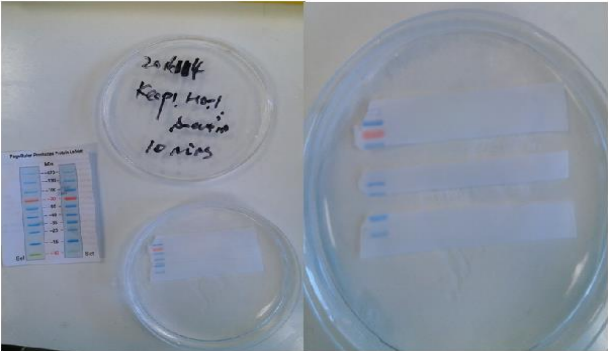

**KEAP1**  
**β-actin**  
**HO-1**

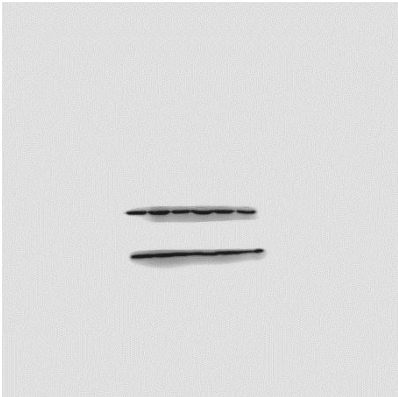

ACTIN-10 MINS-UP

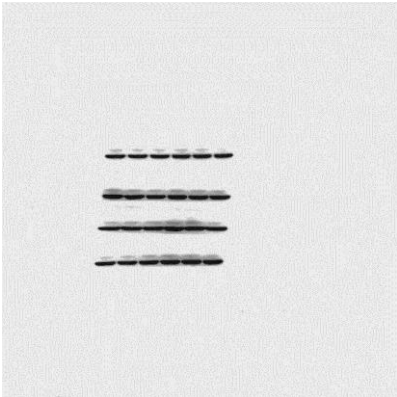

CAT-10 MINS-the last one

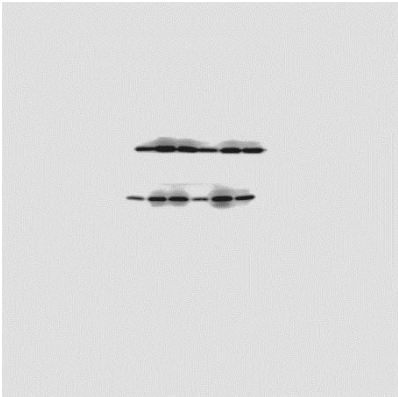

HO-1-10 MINS-UP

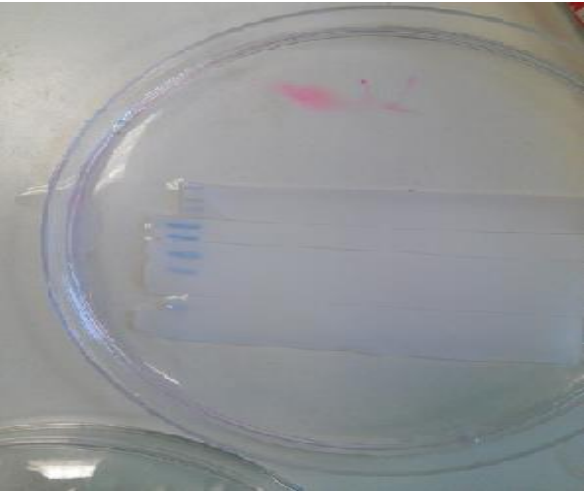

**N-NRF2**  
**Lamin A/C**  
**TBP**

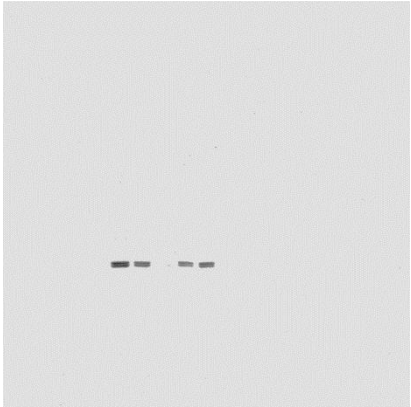

KEAP1-10 MINS

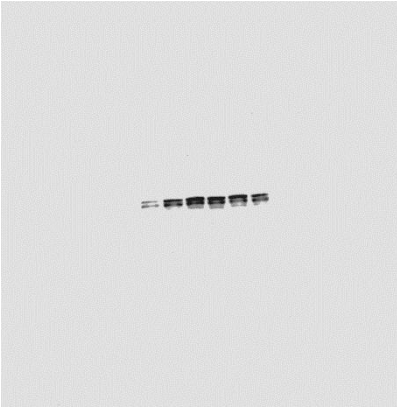

NRF2-10 MINS

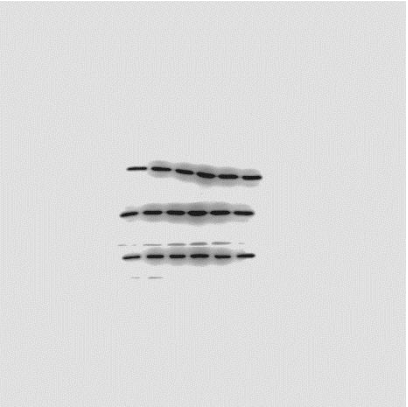

TBP-10 MINS-up

# T98G cell line-12 h

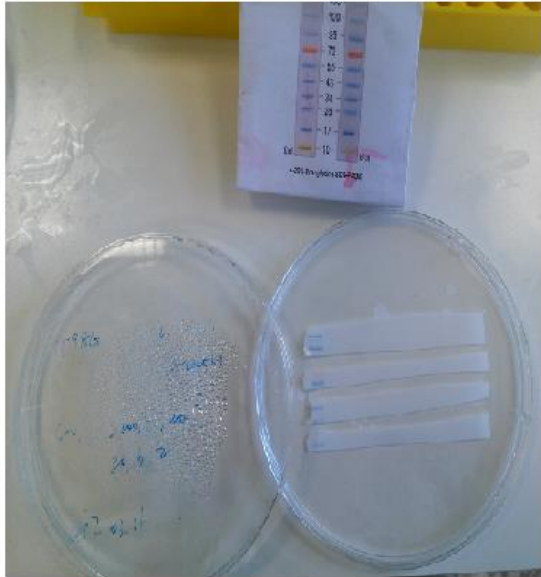

**C-NRF2**  
**KEAP1**  
 **$\beta$ -actin**  
**HO-1**

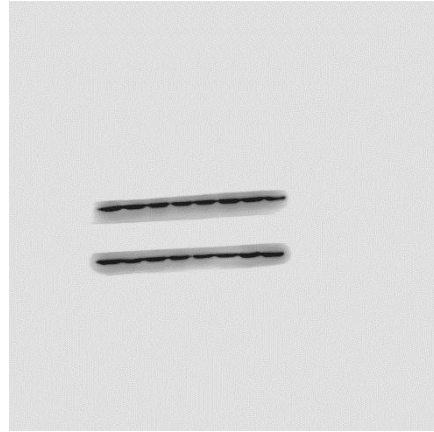

12h-T98G-actin-up

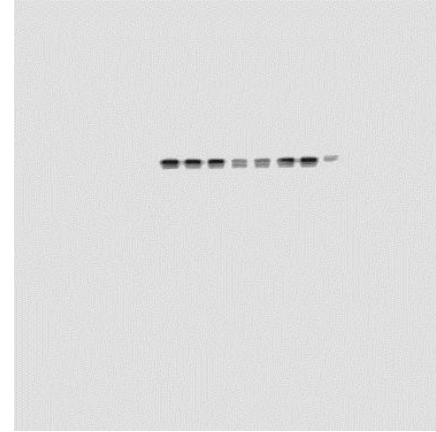

12h-T98G-C-NRF2

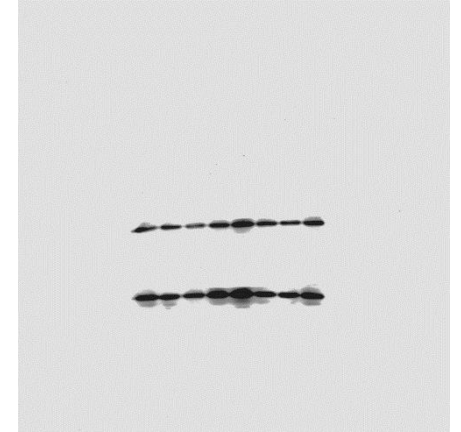

12h-T98G-HO-1-UP

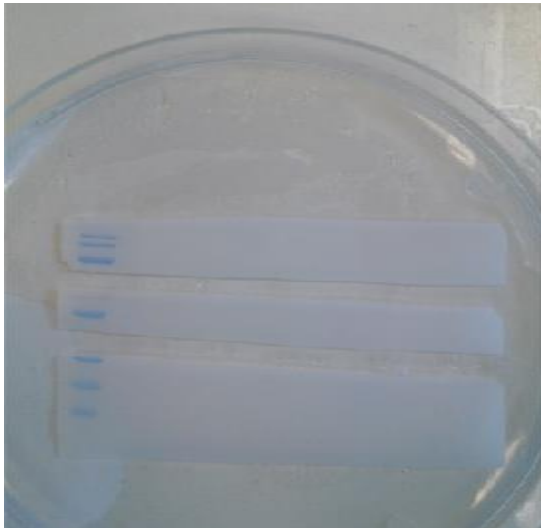

**N-NRF2**  
**Lamin A/C**  
**TBP**

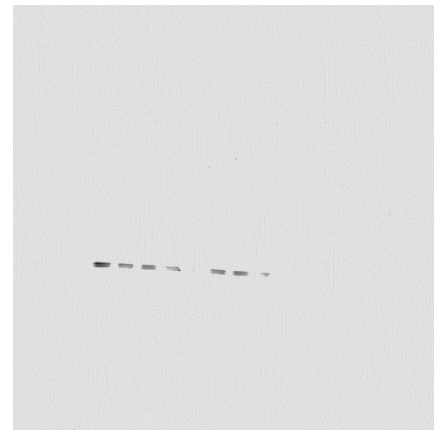

12h-T98G-KEAP1

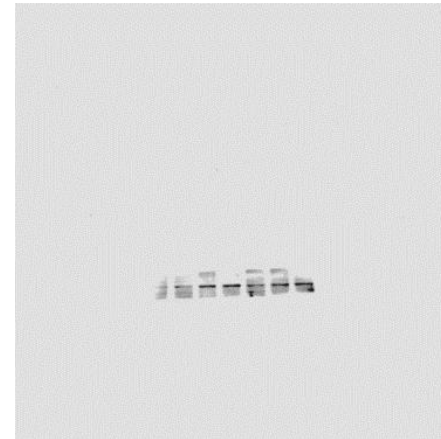

12h-T98G-N-NRF2

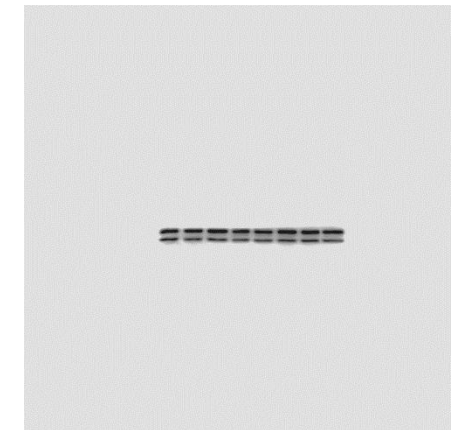

Lamin A and C-12h-T98G

# SH-SY5Y cell line-12h

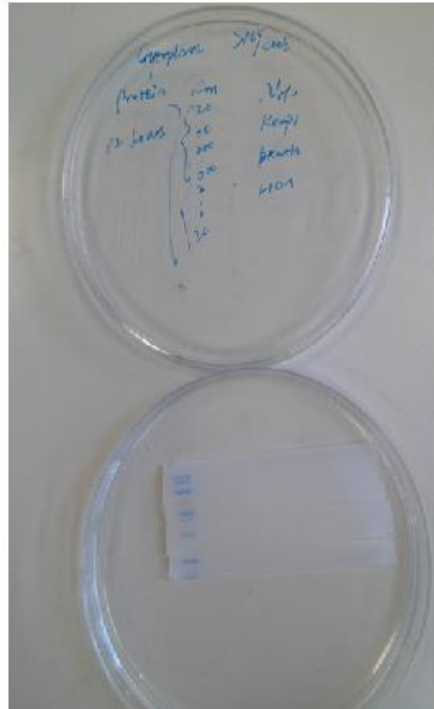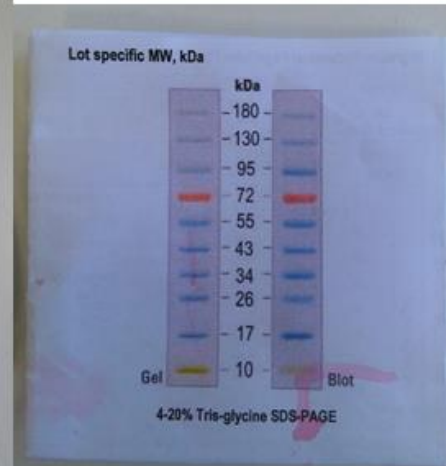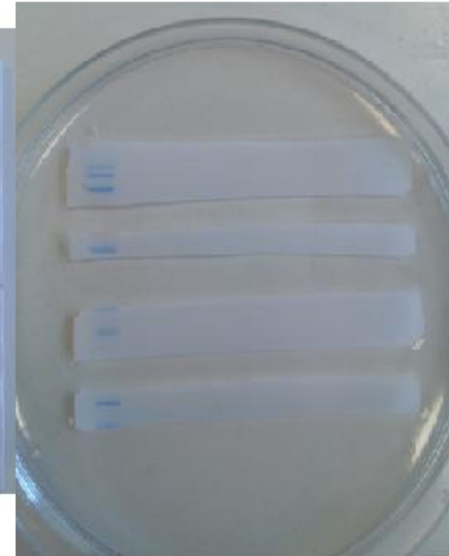

**C-NRF2**  
**KEAP1**  
 **$\beta$ -actin**  
**HO-1**

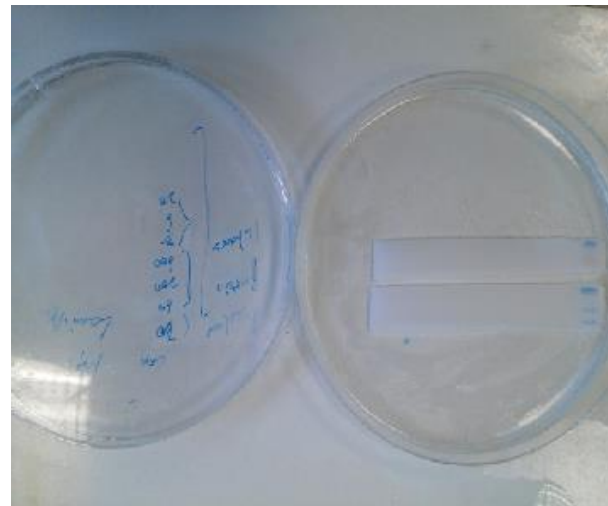

**N-NRF2**  
**Lamin A/C**

# SY-SH5Y cell line-12 h

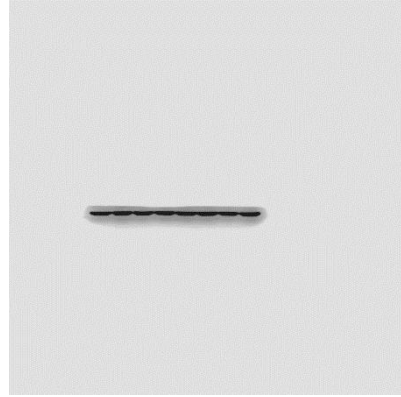

12h-SH-SY5Y-ACTIN

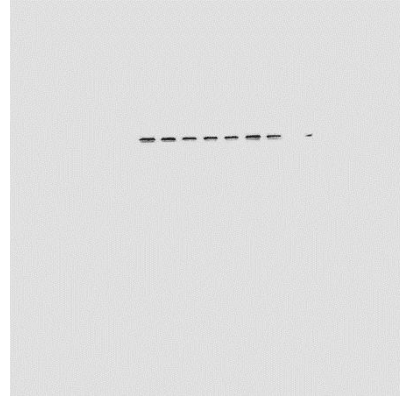

12h-SH-SY5Y-C-NRF2

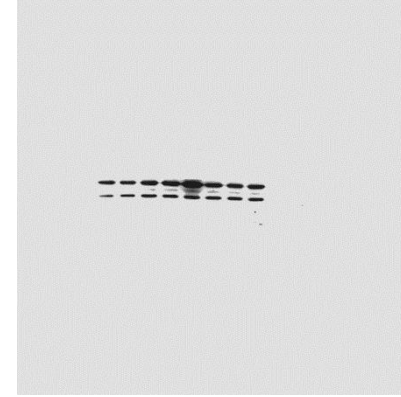

12h-SH-SY5Y-HO-1

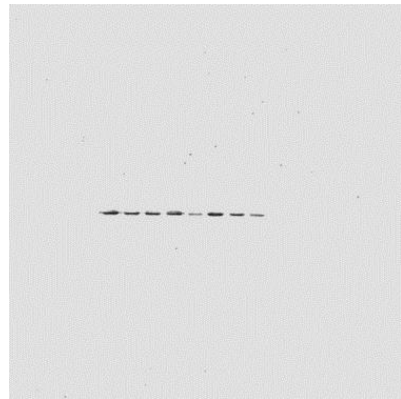

12h-SH-SY5Y-KEAP1

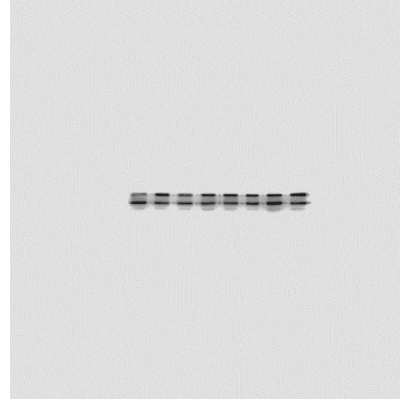

12h-SH-SY5Y-LAMIN A/C

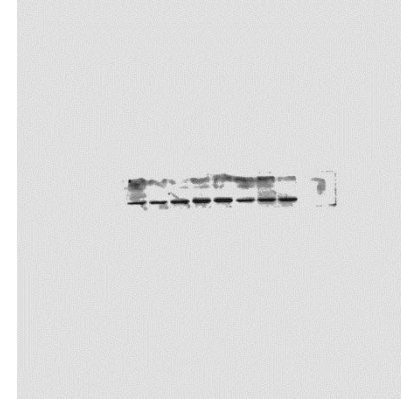

12h-SH-SY5Y-N-NRF2
